1 **Full Title:**

2 Intronic regulation of SARS-CoV-2 receptor (ACE2) expression mediated by immune  
3 signaling and oxidative stress pathways

4

5 **Short Title:**

6 Intronic regulation of SARS-CoV-2 receptor (ACE2) expression

7

8 Daniel Richard<sup>1\*</sup>, Pushpanathan Muthuirulan<sup>1\*</sup>, Jennifer Aguiar<sup>2</sup>, Andrew Doxey<sup>2</sup>, Arin-  
9 jay Banerjee<sup>2-4</sup>, Karen Mossman<sup>5</sup>, Jeremy Hirota<sup>2,5-6</sup>, and Terence D. Capellini<sup>1,7^</sup>

10

11 <sup>1</sup> Department of Human Evolutionary Biology, Harvard University, Cambridge, MA, USA

12 <sup>2</sup> Department of Biology, University of Waterloo, Waterloo, ON, Canada

13 <sup>3</sup> Vaccine and Infectious Disease Organization, University of Saskatchewan; Saskatoon,  
14 SK, Canada

15 <sup>4</sup> Department of Veterinary Microbiology, Western College of Veterinary Medicine, Uni-  
16 versity of Saskatchewan; Saskatoon, SK, Canada

17 <sup>5</sup> Department of Medicine, McMaster University, Hamilton, ON, Canada

18 <sup>6</sup> Division of Respiratory Medicine, Department of Medicine, University of British Colum-  
19 bia, Vancouver, BC, Canada

20 <sup>7</sup> Broad Institute of MIT and Harvard, Cambridge, MA, USA

21

22 \* - These authors contributed equally to this work.

23 ^ - Corresponding author

24

25

26 **Abstract**

27

28 The angiotensin-converting enzyme 2 (ACE2) protein has been highly studied as a key  
29 catalytic regulator of the renin-angiotensin system (RAS), involved in fluid homeostasis  
30 and blood pressure modulation. In addition to its important physiological role as a  
31 broadly-expressed membrane-bound protein, ACE2 serves as a cell-surface receptor  
32 for some viruses - most notably, coronaviruses such as SARS-CoV and SARS-CoV-2.  
33 Differing levels of ACE2 expression may impact viral susceptibility and subsequent  
34 changes to expression may be a pathogenic mechanism of disease risk and manifesta-  
35 tion. Therefore, an improved understanding of how *ACE2* expression is regulated at the  
36 genomic and transcriptional level may help us understand not only how the effects of  
37 pre-existing conditions (e.g., chronic obstructive pulmonary disease) may manifest with  
38 increased COVID-19 incidence, but also the mechanisms that regulate ACE2 levels fol-  
39 lowing viral infection. Here, we initially perform bioinformatic analyses of several da-  
40 taset to generate hypotheses about *ACE2* gene-regulatory mechanisms in the context  
41 of immune signaling and chronic oxidative stress. We then identify putative non-coding  
42 regulatory elements within *ACE2* intronic regions as potential determinants of *ACE2* ex-  
43 pression activity. We perform functional validation of our computational predictions in  
44 vitro via targeted CRISPR-Cas9 deletions of the identified *ACE2* cis-regulatory elements  
45 in the context of both immunological stimulation and oxidative stress conditions. We  
46 demonstrate that intronic *ACE2* regulatory elements are responsive to both immune

47 signaling and oxidative-stress pathways, and this contributes to our understanding of  
48 how expression of this gene may be modulated at both baseline and during immune  
49 challenge. Our work supports the further pursuit of these putative mechanisms in our  
50 understanding, prevention, and treatment of infection and disease caused by ACE2-uti-  
51 lizing viruses such as SARS-CoV, SARS-CoV-2, and future emerging SARS-related vi-  
52 ruses.

53  
54

## 55 **Author Summary**

56

57 The recent emergence of the virus SARS-CoV-2 which has caused the COVID-19 pan-  
58 demic has prompted scientists to intensively study how the virus enters human host  
59 cells. This work has revealed a key protein, ACE2, that acts as a receptor permitting the  
60 virus to infect cells. Much research has focused on how the virus physically interacts  
61 with ACE2, yet little is known on how ACE2 is turned on or off in human cells at the  
62 level of the DNA molecule. Understanding this level of regulation may offer additional  
63 ways to prevent or lower viral entry into human hosts. Here, we have examined the con-  
64 trol of the *ACE2* gene, the DNA sequence that instructs ACE2 protein receptor for-  
65 mation, and we have done so in the context of immune stimulation. We have indeed  
66 identified a number of DNA on/off switches for *ACE2* that appear responsive to immuno-  
67 logical and oxidative stress. These switches may fine-tune how *ACE2* is turned on or off  
68 before, during, and/or after infection by SARS-CoV-2 or other related coronaviruses.  
69 Our studies help pave the way for additional functional studies on these switches, and  
70 their potential therapeutic targeting in the future.

71  
72

## 73 **Introduction**

74

75 The angiotensin-converting enzyme 2 (ACE2) protein has been highly studied as a key  
76 catalytic regulator of the renin-angiotensin system (RAS), involved in fluid homeostasis  
77 and blood pressure modulation(1). ACE2 control on this system occurs both directly  
78 (i.e., by lowering levels of angiotensin II) and indirectly (i.e., via alternative cleavage  
79 products) inhibiting the self-damaging effects of RAS overactivation, including vasocon-  
80 striction, fibrosis, and excessive inflammation(2). The RAS system functions across dif-  
81 ferent organs(1), and similarly, ACE2 is expressed throughout the body(3,4) where it  
82 mediates its protective effects and impacts tissue function(2). This activity has prompted  
83 the pursuit of ACE2 as a clinical target for protection and treatment against cardiovascu-  
84 lar disease, diabetes mellitus, and acute lung damage(2,5).

85

86 In addition to its important physiological role as a broadly-expressed membrane-bound  
87 protein(2), ACE2 serves as a cell-surface receptor for some viruses - most notably,  
88 coronaviruses such as SARS-CoV(6) and SARS-CoV-2(2,5,7). Protein over-expression  
89 studies have demonstrated that ACE2 facilitates SARS-CoV-2 infection(7), while mice  
90 with engineered human ACE2 are susceptible to infection(8), and it has been suggested  
91 that the distribution of ACE2 receptor expression across different tissues contributes to  
92 differential virus susceptibility (e.g., lung tissue and alveolar cells)(9). The tissue

93 expression of ACE2 may also explain the wide-ranging symptoms of COVID-19 in pa-  
94 tients(10), though alternative means of viral entry have been suggested(4). During infec-  
95 tion, ACE2 proteins bound by SARS-CoV-2 particles are endocytosed which, along with  
96 increased ADAM17 activity and upstream transcriptional changes, lead to a depletion of  
97 cell-surface ACE2 localization and reduced angiotensin catalytic activity(5,10). It has  
98 been suggested that reduced expression of ACE2 may lead to an imbalance of the RAS  
99 system in COVID-19 patients, which may represent a major pathological outcome of vi-  
100 ral infection(2). These findings have prompted intense interest in the use of recombinant  
101 ACE2 and other synthetic mimics as potential therapeutics(11–13).

102  
103 Given that levels of ACE2 expression may impact viral susceptibility(4,14), and that sub-  
104 sequent changes to expression is a likely pathogenic mechanism of disease(2), an im-  
105 proved understanding of how ACE2 expression is regulated at the genomic and tran-  
106 scriptional level may help us understand not only how the effects of pre-existing condi-  
107 tions (e.g. chronic obstructive pulmonary disease, (COPD)) may manifest with in-  
108 creased COVID-19 incidence, but also the mechanisms that regulate ACE2 levels fol-  
109 lowing viral infection. In this study, we first perform bioinformatic analyses of several da-  
110 taset to generate hypotheses about ACE2 gene-regulatory mechanisms in the context  
111 of immune signaling and chronic oxidative stress. We next identify putative non-coding  
112 regulatory elements within the intronic regions of the ACE2 gene as potential determi-  
113 nants of ACE2 expression activity. We then perform functional validation of our compu-  
114 tational predictions via targeted deletion of the identified ACE2 cis-regulatory elements  
115 in the context of immunological stimulation and oxidative stress conditions. Our results  
116 demonstrate the presence of intronic ACE2 regulatory elements responsive to both im-  
117 mune signaling and oxidative-stress pathways, contributing to our understanding of how  
118 expression of this gene may be modulated at both baseline and during immune chal-  
119 lenge. Furthermore, our work supports the further pursuit of these putative mechanisms  
120 in our understanding, prevention, and treatment of infection and disease caused by  
121 ACE2-utilizing viruses such as SARS-CoV, SARS-CoV-2, and future emerging SARS-  
122 related viruses(15).

## 123 124 **Results**

### 125 126 **Up-regulation of ACE2 gene expression in healthy individuals is associated with** 127 **immune signalling and viral infection**

128  
129 To first examine patterns of baseline ACE2 gene expression we analyzed microarray  
130 expression datasets from a cohort of healthy, never-smokers (N=109) (see Table S1 for  
131 accessions). In these individuals, ACE2 was co-expressed with a gene set that is most  
132 significantly enriched in immune signaling and virus perturbations (Figure 1, Table S1).  
133 The top transcription factors associated with these genes included IRFs and STATs  
134 (e.g., *IRF1* and *STAT1*). Consistent with this finding, both *IRF1* and *STAT1* genes were  
135 also among the top 200 ACE2 correlated genes. Other genes that were associated with  
136 these enriched 'immune-response', and 'viral response' terms, and co-expressed with  
137 ACE2, include *IFI16*, *IFI44*, *IFI35*, *NLRC5*, and *TLR3*. These findings suggest that in  
138 healthy never-smokers, ACE2 may be a component of an immune signaling pathway,

139 specifically relating to viral sensing and response and potentially mediated by IRF and  
 140 STAT transcription factors.  
 141

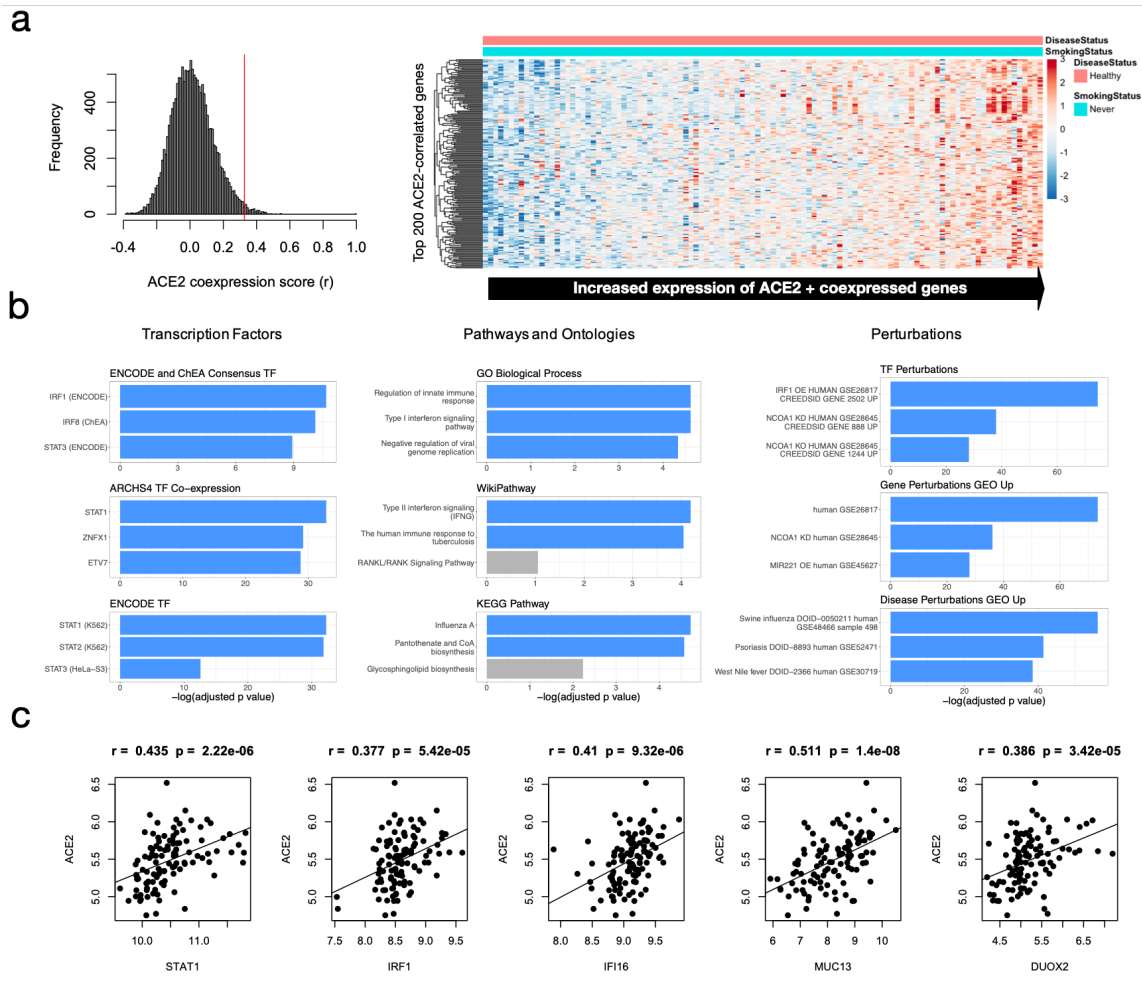

142  
 143  
 144 **Figure 1.** Expression and functional enrichment analysis of *ACE2* and co-expressed  
 145 genes. **a)** Expression of top 200 *ACE2*-correlated genes (including *ACE2*) in healthy,  
 146 non-smokers (N=109). **b)** Functional enrichment analysis of top 200 *ACE2*-correlated  
 147 genes (including *ACE2*). Terms are ranked by  $-\log_2(\text{FDR-adjusted } p \text{ value})$  for nine ontologies/groups of interest.  
 148 **c)** Pearson correlation of *ACE2* with important interferon-related candidate genes found to be co-expressed with *ACE2*.  
 149

150  
 151 During our analysis, we also detected as co-expressed with *ACE2*, *DUOX2*, a known re-  
 152 sponse factor to reactive oxygen species (ROS)(35). This suggests that oxidative stress  
 153 may be another important mechanism that regulates *ACE2* expression (see also Figure  
 154 3). Also of interest are genes that help identify cell-type-specific regulation of *ACE2*,  
 155 along with its co-regulated gene network. The third top-correlated gene with *ACE2* in  
 156 healthy non-smokers was *MUC13*, an epithelial mucin known to be expressed in the  
 157 large intestine and trachea(36) as well as in goblet cells, which are all proposed sites of  
 158 SARS-CoV-2 replication(2).

159 We next examined a cohort of N = 136 individuals with asthma(37) to investigate  
160 whether the observed associations persisted in individuals with chronic inflammatory  
161 lung disease (Figure S1). *ACE2* co-expression in asthmatic individuals was also associ-  
162 ated with immune signaling, antiviral responses, and IRF and STAT transcription fac-  
163 tors. The top *ACE2*-correlated gene in asthmatics was *CD47*, which is involved in the  
164 regulation of interferon gamma. Consistent with this finding, *ACE2* and *CD47* are both  
165 co-expressed with the interferon-inducible gene *IFI44*, whose expression is regulated by  
166 IFN- $\gamma$  exposure(38). Interestingly, *IFI44* has been suggested as a key target for control-  
167 ling the cytokine storm-induced immunopathology observed in patients with influenza vi-  
168 rus and high pathogenic coronavirus infections(39). Based on our microarray expres-  
169 sion analyses, we hypothesized that *ACE2* transcriptional regulation is associated with  
170 an immune-signaling pathway involving IRF and STAT factors.

171  
172 An important limitation of microarray data concerning *ACE2* is the inability to discrimi-  
173 nate between full-length *ACE2* and the recently-discovered short-length isoform  
174 *dACE2*(40). Therefore, the relative contribution of full-length *ACE2* versus short-form  
175 *dACE2* to these expression profiles remains unclear. We therefore sought more explicit,  
176 experimental interrogation of *ACE2* gene regulation by considering the *cis*-regulatory  
177 landscape of the *ACE2* locus.

#### 178 179 **Identification of functional intronic *ACE2* regulatory elements with *STAT1* and** 180 ***IRF1* binding sites**

181  
182 Gene expression is controlled by regulatory sequences bound by transcription factors.  
183 We next examined the regulatory region surrounding *ACE2*, compiling chromatin-acces-  
184 sibility datasets (i.e., Dnase-I Hypersensitivity Sites, (DHS)) from *in-vitro* and adult *in-*  
185 *vivo* lung samples from the ENCODE project (Figure 2). We identified six putative regu-  
186 latory regions overlapping either cell-line or primary tissue DHS signals, a number of  
187 which also possess potential binding motifs for *STAT1* and *IRF1*. We then refined this  
188 list to three putative regulatory elements within intronic regions of *ACE2* (Regions 1,4  
189 and 5 in Figure 2) that overlap DHS data from both lung cell and tissue data and con-  
190 tained either predicted *STAT1* and *IRF1* binding motifs and/or aggregated ChIP-seq da-  
191 taset for each factor (see Methods). These predicted factor binding motifs may be di-  
192 rectly bound by *STAT1* (Regions 1 and 5), and one possibly bound by *IRF1* (Region 5).  
193



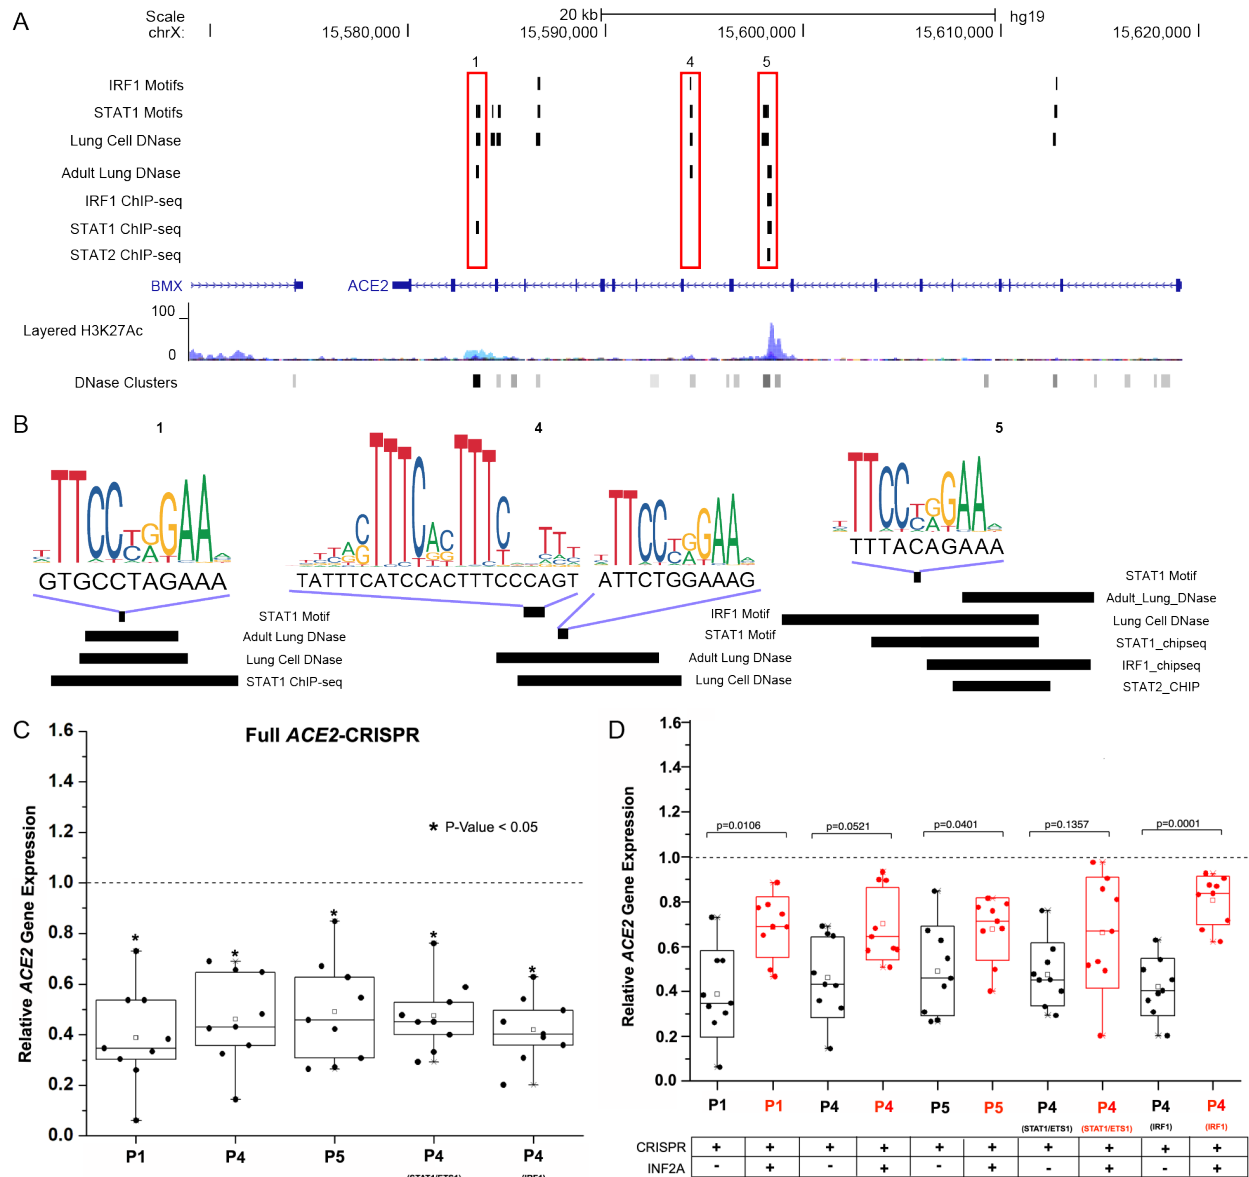

194  
195

196 **Figure 2.** Identification of putative viral-response elements (STAT1 and IRF1 binding  
197 sites) in the *ACE2* intronic region. **a)** Identified transcription factor binding sites in *ACE2*  
198 intronic regions in the human genome (hg19). Three separate regions labeled 1,4,5  
199 contain overlapping ChIP-seq peaks including IRF1, STAT1, and STAT2 binding sites,  
200 as well as DHS in lung cell lines indicative of open-chromatin and active transcriptional  
201 regulation. **b)** DNA sequence matches to predicted IRF and STAT transcription factor  
202 binding sites in the three regions identified above, with corresponding ChIP-seq peaks  
203 indicated as horizontal bars. **c)** Deletion of regions leads to decreased expression of  
204 full-length *ACE2*. **d)** Reductions in expression become attenuated when elements are  
205 deleted in the presence/absence of IFN- $\alpha$  treatment. See also Table S2.

206  
207  
208

In order to test the functionality of these three putative regulatory elements on *ACE2* regulation, we designed CRISPR guide RNAs (sgRNAs) to target and delete each

209 element. We also designed sgRNAs to target predicted STAT1 and IRF1 motifs in Re-  
210 gion 4 (Table S2). We tested our targeting strategy *in-vitro* on a human lung epithelial  
211 cell line (Calu-3). To rule out potential off-target effects, we first confirmed that transfec-  
212 tion of sgRNA plasmids did not disrupt the expression of nearby genes. Specifically, ex-  
213 pression levels of nearby *TMEM-27* and *BMX1* were not significantly altered with dele-  
214 tion of any element or putative binding site (Table S2). Using full-length isoform-specific  
215 primers, we next assessed levels of full-length *ACE2* transcripts using qPCR in wildtype  
216 and CRISPR-deleted cells. We found that full-length *ACE2* expression was significantly  
217 decreased with deletions of each individual element, as well as the targeted binding  
218 sites within Region 4 (Figure 2C, Table S2). A recent study identified that the *dACE2*  
219 isoform is regulated upon SARS-CoV-2 infection(40). Interestingly, using primers spe-  
220 cific to *dACE2*, we found that its transcript levels were also significantly decreased in  
221 our deletion experiments, and to a greater degree compared to full-length *ACE2* (Table  
222 S2). These results indicate that, in the absence of additional perturbation (i.e., above  
223 transfection), each of the three candidate intronic regulatory sequences we tested acts  
224 as an enhancer specifically for *ACE2*.

225  
226 Our bioinformatic analyses of RNA-sequencing datasets and subsequent motif/ChIP-  
227 seq scans suggest that *ACE2* expression is regulated by an immune signaling pathway,  
228 possibly through STAT1 and IRF1 binding activity intronic to the *ACE2* locus. We there-  
229 fore tested the effects of deleting these putative immune-responsive elements and spe-  
230 cific binding sites in the context of immune signaling. Type I Interferons (IFNs), such as  
231 IFN- $\alpha$  are our first line of defence against invading viruses. We used IFN- $\alpha$  treatment to  
232 induce intra-cellular immune signaling pathways that would occur during viral infec-  
233 tions(41) (see Methods). We first performed this experiment on wildtype cells and found  
234 that this treatment did not lead to significant increase of full-length *ACE2* transcripts  
235 (Figure S2a), although *dACE2* levels increased significantly, consistent with a previous  
236 study(40) (Table S2). We independently confirmed this finding at the protein level (Fig-  
237 ure S2b), and further found that additional potent inducers of immune signalling, such  
238 as poly(I:C) treatment and direct infection with SARS-CoV-2, did not lead to significant  
239 up-regulation of full-length *ACE2* at the transcriptional or protein levels.

240  
241 We next performed IFN- $\alpha$  treatment in the context of enhancer deletion. We observed a  
242 significantly decreased effect of CRISPR element deletion on full length *ACE2* gene ex-  
243 pression reduction with IFN- $\alpha$  stimulation compared to expression changes in the ab-  
244 sence of stimulation (Figure 2d, Table S2). This was observed across the majority of our  
245 element and subelement (i.e., motif) deletions. This attenuated down-regulation was  
246 also observed for *dACE2* across stimulation-deletion experiments (Table S2). These  
247 findings suggest that these enhancer elements may be in part responsive to immuno-  
248 logical stimulation (via IFNs) and play a role in a more complicated regulatory mecha-  
249 nism for *ACE2* expression (see Discussion).

250  
251  
252  
253

254 **ACE2 gene expression in lung epithelial cells is correlated with smoking and**  
255 **COPD disease status and associated with an NRF2 antioxidant response**

256  
257 While much of the initial medical literature associated with SARS-CoV-2 patient de-  
258 mographics suggest a link between smoking status and disease severity(42–44), more  
259 recent studies have cast doubts as to the strength and significance of this relation-  
260 ship(45,46). The relationship between smoking history and respiratory viral infection dis-  
261 ease severity has been suggested to be more complicated(47). It is also worth noting  
262 that ACE2, in addition to being the primary receptor for SARS-CoV-2 infection(5,7),  
263 serves an important biological role in multiple tissues(2), and is present in lung epithe-  
264 lium(3,4). Thus, shifts in basal expression levels of this protein, especially over time,  
265 may contribute to lung dysfunction in an indirect, more complex manner than can be  
266 measured using metrics such as COVID-19 disease severity. Given this possibility, we  
267 next assessed expression patterns of bronchial brushing datasets from current and pre-  
268 vious smokers, focusing on ACE2 and other co-expressed genes (e.g. DUOX2).

269  
270 We analyzed a dataset of 159 healthy current smokers versus healthy former smokers,  
271 and identified the top 200 ACE2 correlated genes (Figure 3, Table S1). Expression pat-  
272 terns for ACE2 suggest current smoking status is associated with increased ACE2 lev-  
273 els, consistent with previous observations(48–50), and that this also accounts for the in-  
274 creased ACE2 in COPD patients (Figure 3a). Expression patterns for ACE2-correlated  
275 genes alone were able to effectively distinguish smokers from non-smokers (Fig 3b).  
276 Functional enrichment analysis showed that in this dataset, genes co-expressed with  
277 ACE2 are significantly associated with the NRF2 pathway, oxidative stress, glutathione  
278 metabolism, and TGF- $\beta$  regulation of the extracellular matrix. NRF2 is a key transcrip-  
279 tion factor that regulates the oxidative stress response in the lung(51,52). Consistent  
280 with this, according to both ChIP-seq data and gene expression perturbation data,  
281 NRF2 (*NFE2L2*) was the top transcription factor identified as a likely regulator of these  
282 genes; for example, the NRF2-regulated antioxidant gene *NQO1* was the fourth ranked  
283 ACE2 correlated gene in this dataset. ACE2 correlated genes also overlapped signifi-  
284 cantly with genes upregulated by the transcription factor ETS1 (GSE21129)(53); ETS1  
285 is an important regulator of ROS in response to angiotensin II, linking it to ACE2 func-  
286 tion(54). Moreover, *ETS1* expression is induced by reactive oxygen species (ROS) ex-  
287 posure through an antioxidant response(55). Thus, ACE2 expression in smokers ap-  
288 pears to be associated with oxidative stress gene regulation, likely mediated by NRF2  
289 and ETS1.

290



291

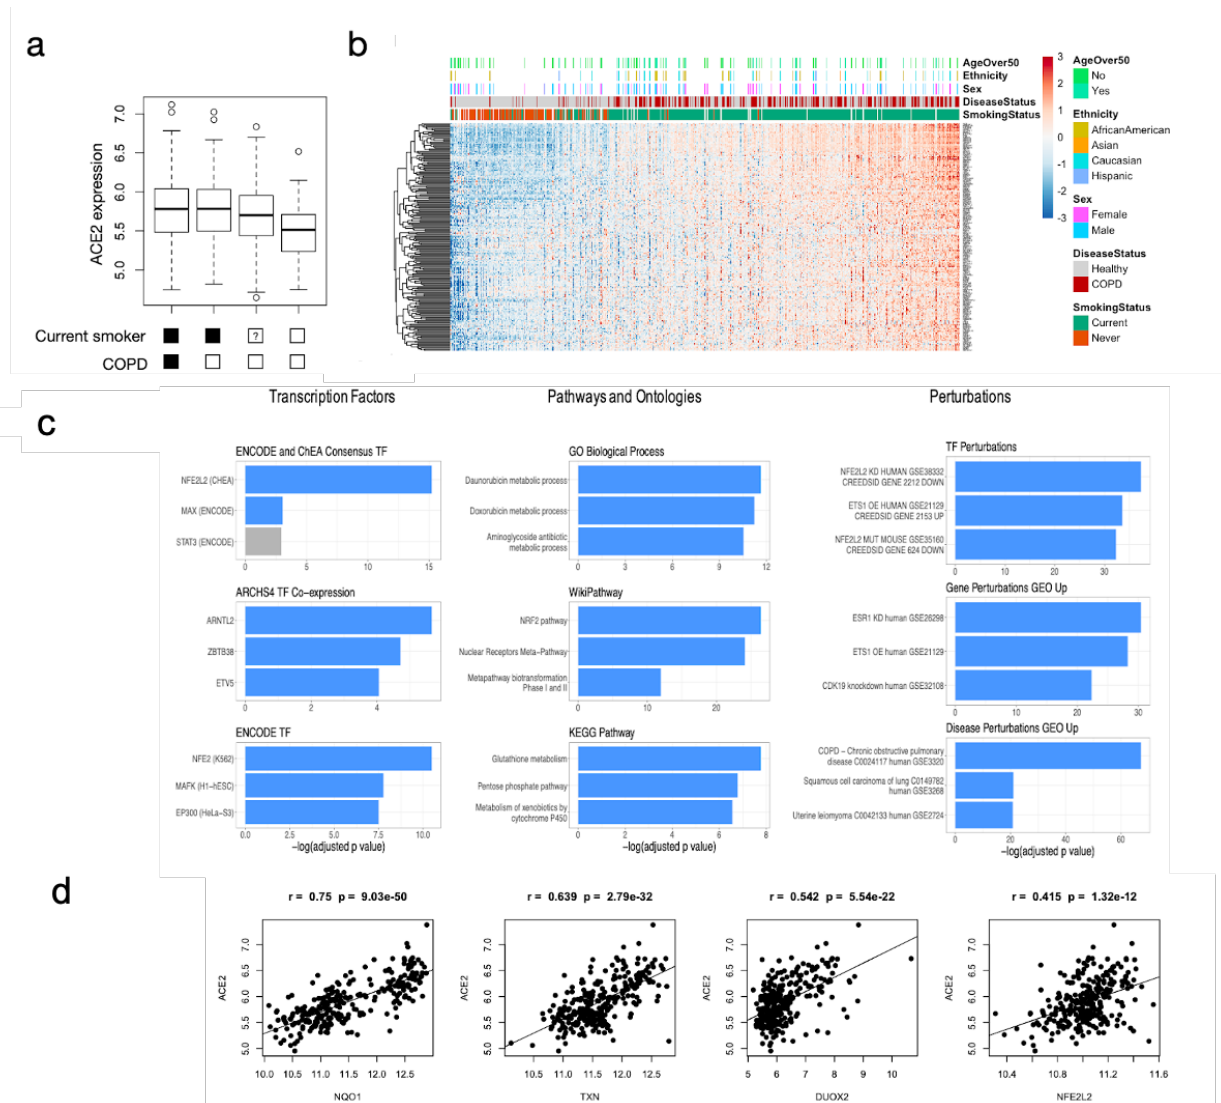

292

293

294 **Figure 3. Expression and functional enrichment analysis of *ACE2* and co-ex-**

295 **pressed genes in smokers and individuals with COPD. a) Analysis of relative *ACE2***

296 **expression with respect to smoking status and COPD diagnosis. b) Expression of top**

297 **200 *ACE2*-correlated genes (including *ACE2*) in individuals with various smoking status**

298 **and COPD diagnosis (N=159). c) Functional enrichment analysis of top 200 *ACE2*-cor-**

299 **related genes (including *ACE2*). Terms are ranked by  $-\log_2(\text{FDR-adjusted } p \text{ value})$  for**

300 **nine ontologies/groups of interest. d) Pearson correlation of *ACE2* with important inter-**

301 **feron-related candidate genes found to be co-expressed with *ACE2*.**

302

303 To verify these trends, we repeated the same analyses with a second cohort dataset

304 from a different microarray platform associated with 345 healthy smokers versus healthy

305 non-smokers (Figure S3). Notably, this dataset consists predominantly of younger indi-

306 viduals (age < 50), whereas the first dataset includes predominantly older individuals (>

307 50). *ACE2* co-expression patterns were highly correlated between the two independent

308 datasets providing support that these are robust signals. As with the first analysis,

genes co-expressed with *ACE2* showed the strongest associations with *NRF2* gene

309 targets. Moreover, *NRF2* and *ETS1* formed the top three overlapping datasets accord-  
310 ing to enrichments for TF Perturbation datasets (Figure S3c). This dataset also included  
311 a larger number of COPD patients; that we observed similar patterns of *ACE2* expres-  
312 sion and co-expressing genes in this analysis may suggest similar effects on smoking  
313 and disease status on *ACE2* regulation (see Discussion).

314

### 315 **Identification of functional intronic *ACE2* regulatory elements with possible anti-** 316 **oxidant-response element (ARE) activity**

317

318 Our microarray data analyses led to a predicted association between oxidative stress  
319 and *ACE2* levels, which prompted us to consider the existence of antioxidant-response  
320 elements (AREs) within the *ACE2* locus (Figure 4a). We performed an unbiased analy-  
321 sis of the locus and regulatory regions intronic to *ACE2* (Figure 4b). Our analysis identi-  
322 fied AP-1 as the top enriched transcription factor binding site in the locus, suggesting  
323 that AP-1 may be an additional regulator of *ACE2*. Klatt *et al.* have shown AP-1-c-Jun  
324 subunit binding to DNA is dependent on the cellular GSH/GSSG ratio, a marker of cellu-  
325 lar ROS levels(56). Looking at the top *ACE2* correlated genes across all datasets, we  
326 identified significant co-expression between *ACE2* and *FOSL2*, as well as *ACE2* and  
327 *JUN*. This suggests that AP-1 may be a transcription factor involved in oxidative stress-  
328 mediated regulation of *ACE2* levels.

329

330 Given the observed motif enrichments for AP-1 and NRF2 transcription factor binding  
331 sites in the *ACE2* locus, we next looked at the individual predicted motif hits for these  
332 factors within the six putative regulatory regions defined above (Figure 4b). Three of  
333 these enhancers (Regions 1, 4, and 5) contained predicted AP-1 and NRF2 binding  
334 sites and were active in both *in-vivo* and *in-vitro* lung datasets. Two of these regions  
335 (Region 1 and 4) also overlapped ChIP-seq datasets for FOS and JUN factors, im-  
336 portant co-factors associated with AP-1 complex(57) and NRF2(58) enhancer binding,  
337 respectively. We next sought to delete these elements in the context of oxidative stress,  
338 with the expectation that, if these elements act as AREs, that the effects of deletion  
339 should be magnified during an ROS response.

340

341 We first examined *ACE2* transcript levels after exposing wildtype Calu-3 cells to hydro-  
342 gen peroxide (0.5mM), a potent ROS(34) (see Methods). We found that exposure to hy-  
343 drogen peroxide led to significant decreases in expression of both full-length *ACE2* and  
344 *dACE2* (Figure S4, Table S2). Previous mouse studies have also demonstrated a down-  
345 regulation of *ACE2* levels and activity following acute ROS exposure(59). However,  
346 *ACE2* levels are up-regulated with chronic oxidative stresses(51,60); this may suggest a  
347 more complicated regulation of *ACE2*, possibly as a function of time (see Discussion).

348

349 We next deleted each regulatory element and assessed *ACE2* expression in the pres-  
350 ence/absence of hydrogen peroxide treatment (see Methods). We observed a signifi-  
351 cant decrease in basal levels of full-length *ACE2* transcripts for the majority of re-  
352 gions/sites deleted in the absence of external stimulus (Table S2). In the context of ex-  
353 ogenous oxidative stress, we observed a further significant decrease only for Region 1,  
354 whilst all other trended downwards (Table S2). For this first region, the magnitude of

355 down-regulation was significantly greater under oxidative stress when compared to the  
 356 unstimulated deletion change (Figure 4c), while for other regions magnitudes were simi-  
 357 larly larger despite the lack of significance (potentially due to the increased variability in  
 358 expression observed in ROS-stressed cells). This first region contains predicted NRF2  
 359 and AP-1 motifs, and also overlaps with both FOS and JUN ChIP-seq signals, possibly  
 360 explaining the increased effect of deletion under ROS conditions. Finally, we again saw  
 361 these differences to be accentuated when considering levels of the *dACE2* transcript  
 362 (Table S2).  
 363

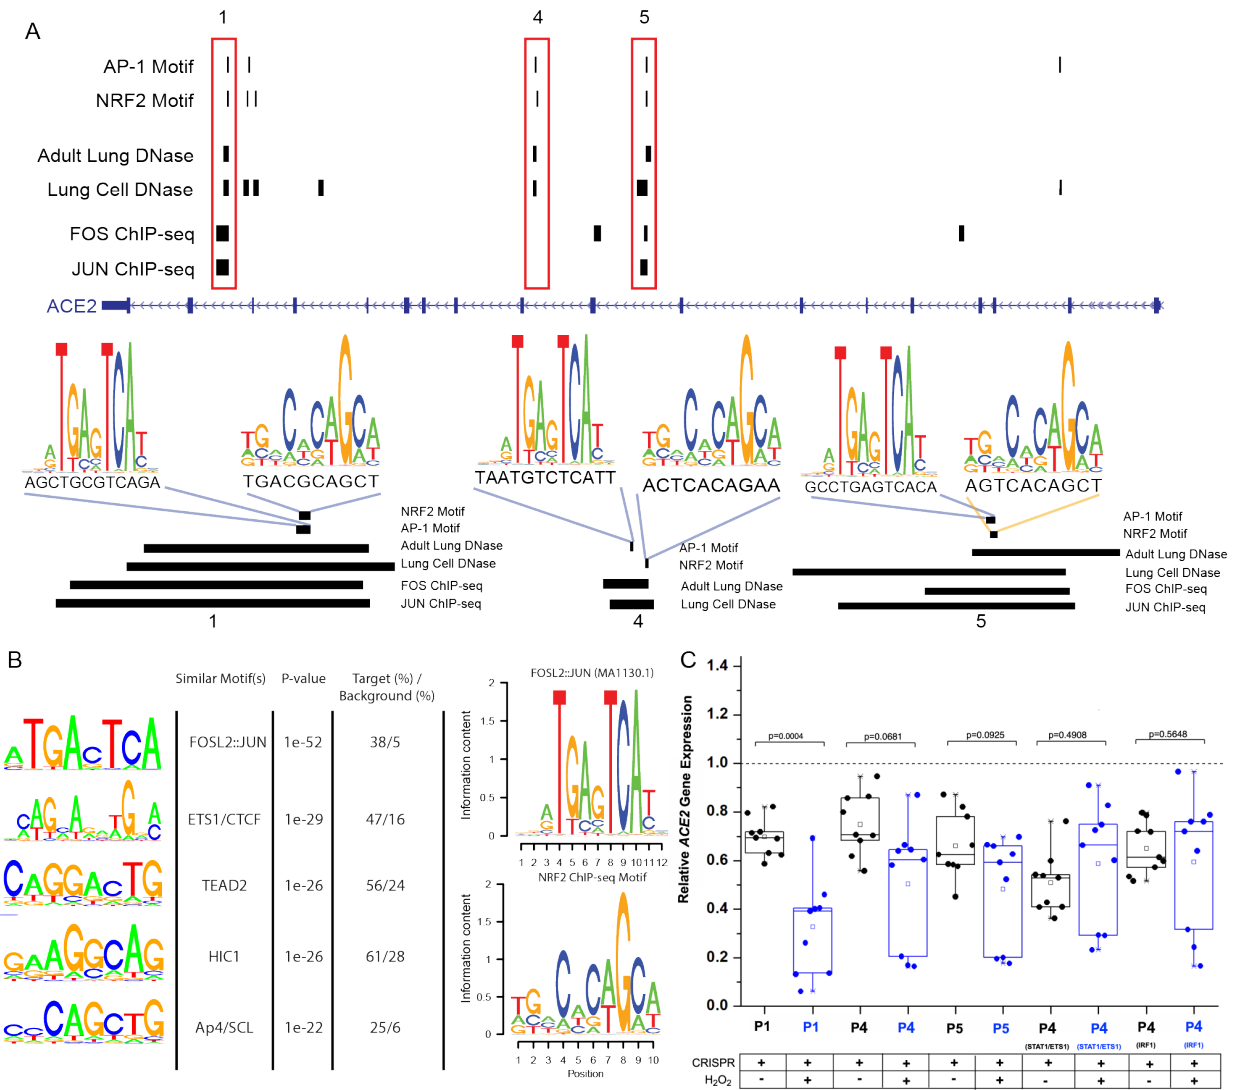

364  
 365

366 **Figure 4.** Putative anti-oxidant response elements (AREs) in the *ACE2* regulatory re-  
 367 gion. **a)** Predicted AP-1 and NRF2 binding sites in *ACE2* intronic regions in the human  
 368 genome. Three separate regions labeled 1, 4, and 5 (red boxes) contain overlapping  
 369 ChIP-seq peaks including FOS/JUN binding sites, as well as DNase hypersensitivity  
 370 peaks in adult lung tissue and cell line samples indicative of open-chromatin and active  
 371 transcriptional regulation. Shown below are DNA sequence matches of predicted AP-1  
 372 and NRF2 transcription factor binding sites in the three regions identified above, with

373 corresponding ChIP-seq peaks indicated as horizontal bars. **b)** (Left) Top statistically  
374 over-represented motifs in *ACE2* non-coding regulatory regions and their top matches  
375 to known transcription factor binding preferences. The top two binding motifs identified  
376 bear strong resemblance to FOSL2:JUN (AP1) and (ETS1/CTCF). (Right) The JAS-  
377 PAR-database FOSL2::JUN binding motif (MA1130.1) was enriched in intragenic *ACE2*  
378 elements. Also shown is an NRF2 binding motif defined using ChIP-seq data. Both mo-  
379 tifs in **(b)** were used to scan intragenic *ACE2* element sequences in **(a)**. **c)** Deletion of  
380 regions leads to decreased expression of full-length *ACE2* in the presence/absence of  
381 oxidative stress (blue boxes). See also Table S2.

382

## 383 Discussion

384

385 Regulation of *ACE2* expression at the transcriptional level may impact susceptibility to  
386 viral infection. Subsequently, changes to *ACE2* expression during viral infection can  
387 lead to an imbalance in renin-angiotensin system (RAS) signalling contributing to the  
388 manifestation of clinical symptoms such as excessive inflammation(61), myocardial in-  
389 jury(10), and lung injury(62). Indeed, it has recently been suggested that targeting tran-  
390 scriptional inhibition of *ACE2* expression may be a therapeutic avenue for prevention of  
391 severe COVID-19 infection(63), while counteracting infection-induced *ACE2* down-regu-  
392 lation is being pursued as a therapeutic treatment to reduce disease severity(11).

393

394 In the first part of our study, we utilized microarray expression datasets from healthy,  
395 non-smokers and identified genes whose expression patterns significantly correlated  
396 with that of *ACE2*. Groups of correlated genes may suggest shared upstream regula-  
397 tors; gene-set enrichment analyses indicated that *ACE2* and correlated genes may be  
398 under the control of immune signalling pathways integrating on the STAT and IRF fami-  
399 lies of transcription factors – namely, STAT1 and IRF1. These results were also ob-  
400 served when performing a separate analysis on asthmatics individuals (Figure S1).  
401 These factors have also previously been associated with possible epigenetic regulation  
402 of *ACE2* expression.

403

404 Given these findings, we considered *cis*-regulatory elements in the *ACE2* locus which  
405 may be proximate mediators of this immune-response regulatory mechanism. After  
406 identifying six such regions, we prioritized and then experimentally deleted three puta-  
407 tive intronic enhancers, containing predicted STAT1 and IRF1 binding motifs. Deletion  
408 of these three elements (Regions 1, 4, and 5) lead to a consistent down-regulation of  
409 *ACE2* transcripts. The down-regulation of *ACE2* upon deletion, relative to mock-trans-  
410 fected controls, suggests that these enhancers may contribute to basal expression. In-  
411 terestingly, performing these deletions in the context of immune stimulation caused a  
412 significant attenuation of this effect, while immune stimulation in wildtype cells caused  
413 no significant changes to expression (Figure S2). These latter results corroborate our  
414 previous findings that SARS-CoV-2 infection does not up-regulate transcript levels of  
415 *ACE2* in spite of significant increases in type I and type III IFNs, as well as up-regulation  
416 of known interferon-stimulated genes (e.g. *IFIT1*, *IRF7*, *OAS2*)(31). The observed atten-  
417 uation effect may suggest an upper-threshold or ‘saturation’ of *ACE2* expression from  
418 baseline, such that immune signalling does not lead to a significant increase. However,

419 following deletion of these putative enhancers, proximate regulators of immune signal-  
420 ing (e.g. STAT1, IRF1) acting elsewhere in the *ACE2* locus (e.g., at the promoter level)  
421 may be able to compensate for the loss/reduction in enhancer activity. Further experi-  
422 mentation (e.g., using a viral-infection model system) may elucidate the role that these  
423 enhancers play in up-regulating *ACE2* during an immune response.

424  
425 An understanding of the mechanisms regulating *ACE2* expression during viral infection  
426 is important from a disease-pathology point of view, given that this may inhibit the pro-  
427 tective effects of *ACE2* activity. In addition, understanding the regulatory mechanisms  
428 controlling *ACE2* expression prior to viral exposure may be of equal importance from a  
429 disease-prevention point of view, given that baseline levels of *ACE2* in high-exposure  
430 tissues (e.g., lung) may modify viral susceptibility(14). It has been suggested, though  
431 not conclusively shown, that chronic smokers are at elevated risk to both SARS-CoV-2  
432 infection as well as severe disease(42,44,46). This follows with previous studies of other  
433 coronaviruses, e.g. MERS-CoV, for which epidemiological evidence does suggest  
434 smoking status as a key risk factor(64,65). In terms of increased susceptibility, it may be  
435 that smokers have elevated base-line *ACE2* expression in lung tissues, increasing the  
436 likelihood that SARS-CoV-2 may bind their target receptors(63).

437  
438 In the second part of our study, we analyzed microarray expression data from two inde-  
439 pendent datasets consisting of current smokers, non-smokers, and COPD patients.  
440 Considering the expression of *ACE2*, we also observed previously-reported increases in  
441 baseline expression within smokers(60,63). With this, as well as genes showing similar  
442 transcriptional behaviours, we identified enrichments for oxidative stress-response path-  
443 ways, including transcriptional regulators such as NRF2 and the AP-1 complex. These  
444 signals are indicative of another potential regulatory mechanism acting on the *ACE2* lo-  
445 cus, and are expected given the chronic oxidative stresses experienced by habitual  
446 smokers and patients with COPD(66).

447  
448 Looking again at the *ACE2* locus we found enrichment in open-chromatin regions (puta-  
449 tive enhancers) for DNA sequences bearing similarity to known FOSL2::JUN binding  
450 motifs, further suggesting the regulatory effects of oxidative-response signalling at this  
451 locus. We therefore performed another set of targeted deletion experiments of putative  
452 intronic enhancers most likely to behave as antioxidant-response elements (AREs) (e.g.  
453 contain NRF2 motifs, AP-1 ChIP-seq signals, etc.). Performing these deletions in the  
454 context of exogenous oxidative stress yielded a substantial decrease in *ACE2* expres-  
455 sion for the first element tested, with a fold-change decrease below that observed in  
456 wildtype cells following treatment.

457  
458 We suggest that this putative ARE, and potentially others which trend in the same direc-  
459 tion, act to counter the inhibitory effects of oxidative stress on *ACE2* expression, which  
460 has been previously observed in a mouse model of hyperoxia(59), preventing a more  
461 deleterious loss of *ACE2* protein following acute exposure. *ACE2* plays an important  
462 role in mitigating acute oxidative stress(67,68), particularly in the context of cardiovas-  
463 cular and lung disease(69,70). We further propose that the repression of *ACE2* upon  
464 acute oxidative stress, when repeated on the order of decades in chronic smokers, may



465 lead to an ‘over-compensation’ of baseline *ACE2* expression – establishing higher lev-  
466 els of *ACE2* protein to protect lung tissues from further damage. This process could be  
467 mediated by a number of oxidative stress-response mechanisms; in particular, our ob-  
468 served enrichments for NRF2-regulated genes co-expressed with *ACE2*, along with the  
469 presence of NRF2 motifs within intronic *ACE2* enhancers, follows with the protective  
470 role of NRF2 signaling induced in response to cigarette smoke(71). Furthermore, a  
471 mouse-model study of cigarette smoke found significant increases in *ACE2* activity only  
472 after three weeks of exposure(72), while additional studies have found dose-response  
473 effects with increased treatment time(51,73). Human smokers also exhibit a dose-re-  
474 sponse effect of *ACE2* expression with increasing pack-years(60). However, we  
475 acknowledge the speculative nature of this proposed over-compensating effect and note  
476 the importance of additional experimental testing. While the links between smoking sta-  
477 tus and COVID-19 severity are controversial, the link between COPD status and  
478 COVID-19 severity may be clearer(47,74,75). More generally, it has been suggested  
479 that the detrimental effects of smoking, most notably attenuation of antiviral innate im-  
480 mune responses(76), can increase susceptibility to pathogen infection(65).

481  
482 In this study, we explored the regulatory mechanisms which may act on the *ACE2* locus  
483 in the context of both immune stimulation as well as oxidative stress, leading us to iden-  
484 tify two putative pathways which may mediate this transcriptional regulation. It is im-  
485 portant to note that these pathways are not mutually-exclusive; the links between im-  
486 mune signalling and oxidative stress are well-established(77), and this is particularly  
487 true for *ACE2* given its biological role in RAS regulation(2,5). We suggest that further  
488 experimental testing is warranted to confirm these predicted mechanisms, and further-  
489 more to develop potential strategies taking advantage of this knowledge to modify sus-  
490 ceptibility and disease severity of coronavirus infections, particularly SARS-CoV-2.

491

## 492 **Materials and Methods**

493

### 494 **ACE2 co-expression and functional enrichment analysis with public microarray** 495 **data**

496

497 Public microarray experiments using Affymetrix chips (HuGene-1.0-st-v1 and HG-U133  
498 Plus 2) on airway epithelial cell samples were obtained from the NCBI Gene Expression  
499 Omnibus (GEO) database, as described in our previous work(4). This resulted in a total  
500 of 1859 individual samples from 33 different experiments (See Table S1). Within this da-  
501 taset, disease status (Healthy: 504, COPD: 338, Asthma: 136) and/or smoking status  
502 (Never: 409, Former: 139, Current: 956) information was included for 1716 samples. For  
503 all datasets, raw intensity values and annotation data were downloaded using the  
504 *GEOquery* R package (version 2.52.0)(16) from the Bioconductor project. Probe defini-  
505 tion files were downloaded from Bioconductor and probes were annotated using Biocon-  
506 ductor's *annotate* package. All gene expression data were unified into a single dataset  
507 that was then RMA-normalized, and only genes present in both of the Affymetrix plat-  
508 forms (N = 16,105) were kept for subsequent analyses. Correction of experiment-spe-  
509 cific batch effects was performed using the ComBat method implemented using the *sva*  
510 R package (version 3.32.1).

511

512 Top *ACE2* co-expressed genes were identified based on the 200 highest Pearson cor-  
513 relation (*r*) values to *ACE2*. Heat maps for top 200 *ACE2*-correlated genes across sam-  
514 ples were generated with the *heatmap* R package (version 1.0.12). For display only,  
515 expression values were row-normalized (across gene) using the 'scale' function in base  
516 R, and converted to Z-scores. For heat map coloring, a "ceiling" and "floor" of +3 and -3  
517 was applied to the Z-scores. Histograms and *ACE2* correlation scatter plots were gener-  
518 ated with the *base* R package (version 3.6.3)(17). Gene lists are available in Table S1.

519

520 The top 200 *ACE2*-correlated genes were analyzed using Enrichr(18) to identify en-  
521 riched pathways and functional ontologies. Terms were ranked within ontologies by  
522 FDR-adjusted *p* value (calculated by Enrichr by running the Fisher exact test for random  
523 gene sets in order to compute a mean rank and standard deviation from the expected  
524 rank for each term in the gene set library) and the top 3 terms for ontologies of interest  
525 were selected. Functional enrichment bar plots were generated with the *ggplot2* R pack-  
526 age (version 3.2.1).

527

### 528 **ACE2 regulatory region analyses**

529

530 ENCODE(19) DNase-seq datasets were obtained for adult lung (File accessions:  
531 ENCFF271JAF, ENCFF331SYD, ENCFF681UOZ) and primary cell (ENCFF165ZIA,  
532 ENCFF334RSR, ENCFF338GII, ENCFF446FTN, ENCFF460ZFL, ENCFF546QUZ,  
533 ENCFF644XOI, ENCFF957JQC) samples as processed hg19 bed-formatted files.  
534 Called peaks (putative regulatory elements) were subsequently intersected within  
535 lung/cell sets using *bedtools*(20) (version 2.26.0), requiring that a peak be replicated in  
536 at least two samples for retention. To capture a broader regulatory region around the  
537 *ACE2* gene, peaks falling within 1MB upstream/downstream of the *ACE2* promoter were

538 collected and pooled across lung/cell sets. Human hg19 reference sequences were ob-  
539 tained for these elements using UCSC(21).

540  
541 Sequences were subsequently used for *de novo* motif analysis using HOMER (version  
542 4.10)(22) using a 10x random shuffling as a background set. *De novo* motifs were com-  
543 pared to a vertebrate motif library included with HOMER which incorporates the JAS-  
544 PAR(23) database. Matches are scored using Pearson's correlation coefficient of vec-  
545 torized motif matrices (PWMs), with neutral frequencies (0.25) substituted for non-over-  
546 lapping (e.g., gapped) positions. Best-matching motif PWMs obtained from this analysis  
547 are shown in Figure 4B. The highest-rank motif bore close similarity to the *FOSL2::JUN*  
548 PWM from the JASPAR database (MA1130.1). This reference PWM was subsequently  
549 used for motif scanning. The AME program(24), part of the MEME-Suite(25), was also  
550 used with these sequences to look for enrichments of known transcription factor (TF)  
551 motifs. Focusing on elements intragenic to *ACE2* as more proximate candidate regula-  
552 tory regions, these reference sequences were also tested for enriched motifs using  
553 AME. The *FOSL2::JUN* (MA1130.1) PWM was used to scan these sequences using  
554 TFBSTools(26) (version 1.24.0). Hits of minimum sequence scores of 80% were re-  
555 tained, and subsequently filtered for Benjamini-Hochberg adjusted *p* value < 0.05. For  
556 illustrative purposes, the best-scoring hit for each hit-containing element was selected.  
557 JASPAR-database motif matrices were also obtained for *STAT1* (MA0137.3), and *IRF1*  
558 (MA0050.2) and similarly used to scan intragenic *ACE2* elements using TFBSTools as  
559 described. Given the observed expression data for *NRF2*, a ChIP-seq dataset for this  
560 factor (GSE37589)(27) was downloaded as called hg18 peaks. These were lifted-over  
561 to hg19 using the UCSC liftOver utility(21) with sulforaphane and vehicle-treatment da-  
562 taset pooled and merged for a final set of 919 peaks. Reference hg19 sequences were  
563 obtained for these peaks and used with HOMER to define an *NRF2 de novo* motif; the  
564 resulting PWM was subsequently used with TFBSTools to scan the putative *ACE2* intra-  
565 genic regulatory sequences as described above. ChIP-seq data for indicated factors  
566 (*IRF1*, *STAT1*, *STAT2*, *FOS* and *JUN*) were obtained from ChIP-ATLAS(28) as an ag-  
567 gregate across all cell types using a significance threshold of 50 (*q* value < 1e-5). Peak  
568 files (hg19) were sorted and merged for overlapping peaks using bedtools. DNase,  
569 ChIP-seq, and motif hit tracks were loaded into the UCSC Genome Browser(29) for vis-  
570 ualization.

## 571 572 ***In-vitro* experimental validation studies**

### 573 574 **Poly(I:C) transfection and IFN treatment**

575  
576 Calu-3 cells were mock transfected with 4  $\mu$ L of lipofectamine 3000 (ThermoFisher Sci-  
577 entific) in Opti-MEM (ThermoFisher Scientific) only or transfected with 100 ng of  
578 poly(I:C) (InvivoGen) for 6 hours. Recombinant human IFN $\beta$ 1 was generated using *Dro-*  
579 *sophila* Schneider 2 (S2) cells following manufacturer's recommendation and by using  
580 ThermoFisher Scientific's *Drosophila* Expression system (ThermoFisher Scientific). Re-  
581 combinant IFN $\beta$ 1 was collected as part of the cell culture supernatant from S2 cells and  
582 total protein was measured using Bradford assay. Total protein concentration was used  
583 for subsequent experiments. To demonstrate that S2 cell culture media did not contain

584 non-specific stimulators of mammalian antiviral responses, we also generated recombi-  
585 nant green fluorescent protein (GFP) using the same protocol and used the highest total  
586 protein concentration (2 mg/ml) for mock treated cells. SARS-CoV-2 infected cells were  
587 treated with supernatant containing IFN $\beta$ 1 or GFP for 6 hours.

588

### 589 **SARS-CoV-2 infection**

590

591 Clinical isolate of SARS-CoV-2 (SARS-CoV-2/SB3) was propagated on Vero E6 cells  
592 and validated by next generation sequencing(30). Virus stocks were thawed once and  
593 used for an experiment. A fresh vial was used for each experiment to avoid repeated  
594 freeze-thaws.

595

### 596 **Immunoblots**

597

598 Calu-3 cells were seeded at a density of  $3 \times 10^5$  cells/well in 12-well plates. Cells were  
599 infected with SARS-CoV-2 at an MOI of 1. Control cells were sham infected. Twelve  
600 hours post incubation, cells were transfected or treated with poly(I:C) or IFN $\beta$ , respec-  
601 tively for 6 hours. Cell lysates were harvested for immunoblots and analyzed on reduc-  
602 ing gels as mentioned previously(31,32). Briefly, samples were denatured in a reducing  
603 sample buffer and analyzed on a reducing gel. Proteins were blotted from the gel onto  
604 polyvinylidene difluoride (PVDF) membranes (Immobilon, EMD Millipore) and detected  
605 using primary and secondary antibodies. Primary antibodies used were: 1:1000 mouse  
606 anti-SARS/SARS-CoV-2 N (ThermoFisher Scientific; Catalogue number: MA5-29981;  
607 RRID: AB\_2785780), 1:1000 rabbit anti-beta-actin (Abcam; Catalogue number: ab8227;  
608 RRID: AB\_2305186), and 2  $\mu$ g/ml of mouse anti-ACE2 (R&D Systems; Catalogue:  
609 MAB933; RRID: AB\_2223153). Secondary antibodies used were: 1:5000 donkey anti-  
610 rabbit 800 (LI-COR Biosciences; Catalogue number: 926-32213; RRID: 621848) and  
611 1:5000 goat anti-mouse 680 (LI-COR Biosciences; Catalogue number: 925-68070;  
612 RRID: AB\_2651128). Blots were observed and imaged using Image Studio (LI-COR Bi-  
613 osciences) on the Odyssey CLx imaging system (LI-COR Biosciences).

614

### 615 **Cell line and culture condition**

616

617 The human lung adenocarcinoma cell line, Calu-3 (ATCC HTB-55) were grown in Mini-  
618 mum Essential Medium (MEM)- $\alpha$  (Gibco, Gaithersburg, Maryland) supplemented with  
619 10% fetal bovine serum (FBS), and 1% penicillin-streptomycin (P/S) in 5% CO $_2$  at 37°C.  
620 Media was replaced every 2 days and the cells were subcultured every 5 days. The  
621 cells were passaged and used in experimental assays without additional STR authenti-  
622 cation or mycoplasma testing.

623

### 624 **CRISPR targeting of ACE2 regulatory elements *in vitro***

625

626 All sgRNAs flanking human ACE2 regulatory elements and sub-elements containing TF  
627 binding sites were designed using the Genetic Perturbation Platform (GPP) sgRNA de-  
628 sign tool from Broad Institute (<https://portals.broadinstitute.org/gpp/public/>), synthesized  
629 by Integrated DNA Technologies, Inc (Coralville, Iowa), and cloned into the PX458

630 vector following published protocols(33). The sequence of all sgRNAs along with their  
631 chromosomal locations (hg19) are listed in Table S2.

632  
633 Guide RNAs (see Table S2), flanking the *ACE2* regulatory elements and sub elements  
634 containing TF binding sites, were first tested for the ability to induce efficient deletions of  
635 the enhancer elements/sub elements in cultured Calu-3 cells (N = 3 biological replicates  
636 per assay). Calu-3 cells were maintained in MEM  $\alpha$  media supplied with 10% FBS  
637 (Gibco) and 1% Pen/Strep (0.025%) and seeded in a six-well plate for 1- day prior to  
638 transfection. After culturing at 37°C with 5% CO<sub>2</sub>, the cells were scanned for GFP fluo-  
639 rescence under GFP-microscope at 24 h to verify successful transfection efficiency (i.e.,  
640 >70% of the cells were GFP positive). After 48 h of CRISPR experiment, DNA was ex-  
641 tracted from the CRISPR-cas9 targeted Calu-3 cells using E.Z.N.A Tissue DNA Kit  
642 (Omega Bio-Tek, Norcross, GA), and the *ACE2* regulatory element/sub-element region  
643 was amplified using PCR primers flanking each sgRNA location (listed in Table S2).  
644 PCR amplified products were purified from 1% agarose gel using E.Z.N.A Gel Extrac-  
645 tion Kit (Omega Bio-Tek, Norcross, GA). Sanger sequencing was used to verify suc-  
646 cessful deletion of the target region. To examine effects on *ACE2* and nearby gene ex-  
647 pression (*TMEM-27* and *BMX1*), RNA was extracted from control and CRISPR-Cas9  
648 targeted Calu-3 cells (N = 3 biological replicates, with 3 technical replicates per experi-  
649 ment per condition) and prepared using Trizol Reagent (Thermo Fisher Scientific,  
650 Springfield Township, New Jersey) and Direct-zol™ RNA Miniprep kit (ZYMO). Two mi-  
651 crograms of total RNA were used to synthesize first-strand cDNA using SuperScript III  
652 First-Strand Synthesis System (Thermo Fisher Scientific). qRT-PCR analysis was then  
653 performed with gene specific primers and Applied Biosystems Power SYBR master mix  
654 (Thermo Fisher Scientific) with *ACTB* house-keeping gene as an internal control. sgR-  
655 NAs and primers used for qRT-PCR are listed in Table S2.

### 656 657 **CRISPR deletion of *ACE2* regulatory elements under interferon treatment**

658  
659 Briefly, the Calu-3 cells were cultured in MEM  $\alpha$  media supplemented with 10% FBS  
660 (Gibco) and 1% Pen/Strep (0.025%), plated in 6-well plates and utilized at ~70% conflu-  
661 ence. The cells were then subjected to CRISPR-Cas9 mediated deletion of *ACE2* regu-  
662 latory elements/sub-elements in the presence/absence of recombinant protein of human  
663 interferon, alpha 2 (IFNA2) (OriGene Technologies Inc, Atlanta, GA) (100 ng/ml) for 48  
664 h. Following CRISPR-deletion under interferon treatment, DNA and RNA were extracted  
665 from the Calu-3 cells and used for genotyping and gene expression analysis, respec-  
666 tively.

### 667 668 **CRISPR deletion of *ACE2* regulatory elements under H<sub>2</sub>O<sub>2</sub> treatment**

669  
670 The Calu-3 cells were cultured in MEM  $\alpha$  media as described above and subjected to  
671 CRISPR-cas9 mediated deletion of *ACE2* regulatory elements/sub elements for 48 h.  
672 CRISPR-cas9 targeted Calu-3 cells were treated with hydrogen peroxide (H<sub>2</sub>O<sub>2</sub>) using  
673 the protocol described previously(34). Following CRISPR deletion of *ACE2* regulatory  
674 elements/sub elements, the Calu-3 cells were challenged with or without oxidative  
675 stress by exposure to 0.5 mM (initial dose) of H<sub>2</sub>O<sub>2</sub>. As Calu-3 cells rapidly metabolize



676 H<sub>2</sub>O<sub>2</sub> in 1 h, H<sub>2</sub>O<sub>2</sub> treatments were performed for 2 h, with additional bolus of H<sub>2</sub>O<sub>2</sub>  
677 every 60 min for times longer than 1 h. DNA and RNA were extracted from the CRISPR-  
678 cas9 targeted Calu-3 cells subjected to H<sub>2</sub>O<sub>2</sub> treatment, and used for genotyping and  
679 gene expression analysis, respectively.

680

## 681 **Acknowledgements**

682

683 The authors would like to thank Harvard University Dean Christopher Stubbs and Dean  
684 Francis Doyle for granting restricted access to the Capellini Laboratory during the  
685 COVID-19 pandemic to perform these studies. The authors would like to thank mem-  
686 bers of the Capellini, Doxey, and Hirota labs for critical insight into this work. AB was the  
687 recipient of a fellowship from the Natural Sciences and Engineering Research Council  
688 of Canada (NSERC). VIDO receives operational funding for its CL3 facility (InterVac)  
689 from the Canada Foundation for Innovation through the Major Science Initiatives. VIDO  
690 also receives operational funding from the Government of Saskatchewan through Inno-  
691 vation Saskatchewan and the Ministry of Agriculture. ACD is funded in part by an  
692 NSERC Discovery Grant (RGPIN-2019-04266). TDC is funded in part by The American  
693 School of Prehistoric Research, Harvard University.

694

## 695 **References**

696

- 697 1. Lavoie JL, Sigmund CD. Minireview: Overview of the renin-angiotensin system -  
698 An endocrine and paracrine system. In: Endocrinology [Internet]. Oxford  
699 Academic; 2003 [cited 2021 May 11]. p. 2179–83. Available from:  
700 <https://academic.oup.com/endo/article/144/6/2179/2880369>
- 701 2. Gheblawi M, Wang K, Viveiros A, Nguyen Q, Zhong JC, Turner AJ, et al.  
702 Angiotensin-Converting Enzyme 2: SARS-CoV-2 Receptor and Regulator of the  
703 Renin-Angiotensin System: Celebrating the 20th Anniversary of the Discovery of  
704 ACE2 [Internet]. Vol. 126, Circulation Research. Lippincott Williams and Wilkins;  
705 2020 [cited 2021 May 3]. p. 1456–74. Available from: /pmc/articles/PMC7188049/  
706 3. Hikmet F, Méar L, Edvinsson Å, Micke P, Uhlén M, Lindskog C. The protein  
707 expression profile of ACE2 in human tissues. Mol Syst Biol [Internet]. 2020 Jul  
708 [cited 2021 May 28];16(7). Available from: /pmc/articles/PMC7383091/  
709 4. Aguiar JA, Tremblay BJM, Mansfield MJ, Woody O, Lobb B, Banerjee A, et al.  
710 Gene expression and in situ protein profiling of candidate SARS-CoV-2 receptors  
711 in human airway epithelial cells and lung tissue. Eur Respir J [Internet]. 2020 Sep  
712 1 [cited 2021 May 28];56(3). Available from:  
713 <https://doi.org/10.1183/13993003.01123-2020>.
- 714 5. Wang K, Gheblawi M, Oudit GY. Angiotensin Converting Enzyme 2: A Double-  
715 Edged Sword [Internet]. Vol. 142, Circulation. Lippincott Williams and Wilkins;  
716 2020 [cited 2021 May 28]. p. 426–8. Available from:  
717 <https://pubmed.ncbi.nlm.nih.gov/32213097/>
- 718 6. Li W, Moore MJ, Vaslieva N, Sui J, Wong SK, Berne MA, et al. Angiotensin-  
719 converting enzyme 2 is a functional receptor for the SARS coronavirus. Nature  
720 [Internet]. 2003 Nov 27 [cited 2021 May 28];426(6965):450–4. Available from:  
721 [www.nature.com/nature](http://www.nature.com/nature).

- 722 7. Zhou P, Yang X Lou, Wang XG, Hu B, Zhang L, Zhang W, et al. A pneumonia  
723 outbreak associated with a new coronavirus of probable bat origin. *Nature*  
724 [Internet]. 2020 Mar 12 [cited 2021 May 3];579(7798):270–3. Available from:  
725 <https://doi.org/10.1038/s41586-020-2012-7>
- 726 8. Yinda CK, Port JR, Bushmaker T, Owusu IO, Purushotham JN, Avanzato VA, et  
727 al. K18-hACE2 mice develop respiratory disease resembling severe COVID-19.  
728 *PLoS Pathog* [Internet]. 2021 Jan 19 [cited 2021 May 28];17(1):e1009195.  
729 Available from: <https://doi.org/10.1371/journal.ppat.1009195>
- 730 9. Zhang H, Penninger JM, Li Y, Zhong N, Slutsky AS. Angiotensin-converting  
731 enzyme 2 (ACE2) as a SARS-CoV-2 receptor: molecular mechanisms and  
732 potential therapeutic target. *Intensive Care Med* [Internet]. 2020 Apr 1 [cited 2021  
733 May 28];46(4):586–90. Available from:  
734 <https://pubmed.ncbi.nlm.nih.gov/32125455/>
- 735 10. Clerkin KJ, Fried JA, Raikhelkar J, Sayer G, Griffin JM, Masoumi A, et al. COVID-  
736 19 and Cardiovascular Disease [Internet]. Vol. 141, *Circulation*. Lippincott  
737 Williams and Wilkins; 2020 [cited 2021 May 28]. p. 1648–55. Available from:  
738 <http://ahajournals.org>
- 739 11. Zhang J, Xie B, Hashimoto K. Current status of potential therapeutic candidates  
740 for the COVID-19 crisis [Internet]. Vol. 87, *Brain, Behavior, and Immunity*.  
741 Academic Press Inc.; 2020 [cited 2021 May 3]. p. 59–73. Available from:  
742 </pmc/articles/PMC7175848/>
- 743 12. Hippisley-Cox J, Young D, Coupland C, Channon KM, Tan PS, Harrison DA, et al.  
744 Risk of severe COVID-19 disease with ACE inhibitors and angiotensin receptor  
745 blockers: Cohort study including 8.3 million people. *Heart* [Internet]. 2020 Oct 1  
746 [cited 2021 May 3];106(19):1503–11. Available from: <http://heart.bmj.com/>
- 747 13. Monteil V, Dyczynski M, Lauschke VM, Kwon H, Wirnsberger G, Youhanna S, et  
748 al. Human soluble ACE2 improves the effect of remdesivir in SARS-CoV-2  
749 infection. *EMBO Mol Med* [Internet]. 2021 Jan 11 [cited 2021 May 11];13(1).  
750 Available from: <https://pubmed.ncbi.nlm.nih.gov/33179852/>
- 751 14. Devaux CA, Rolain JM, Raoult D. ACE2 receptor polymorphism: Susceptibility to  
752 SARS-CoV-2, hypertension, multi-organ failure, and COVID-19 disease outcome.  
753 Vol. 53, *Journal of Microbiology, Immunology and Infection*. Elsevier Ltd; 2020. p.  
754 425–35.
- 755 15. Wells HL, Letko M, Lasso G, Ssebide B, Nziza J, Byarugaba DK, et al. The  
756 evolutionary history of ACE2 usage within the coronavirus subgenus Sarbecovirus  
757 . *Virus Evol* [Internet]. 2021 Jan 20 [cited 2021 May 28];7(1):7. Available from:  
758 </pmc/articles/PMC7928622/>
- 759 16. Sean D, Meltzer PS. GEOquery: A bridge between the Gene Expression Omnibus  
760 (GEO) and BioConductor. *Bioinformatics* [Internet]. 2007 Jul 15 [cited 2021 May  
761 28];23(14):1846–7. Available from: <https://pubmed.ncbi.nlm.nih.gov/17496320/>
- 762 17. R Development Core Team. R: A Language and Environment for Statistical  
763 Computing [Internet]. Vienna, Austria; 2008. Available from: [http://www.r-](http://www.r-project.org)  
764 [project.org](http://www.r-project.org)
- 765 18. Kuleshov M V., Jones MR, Rouillard AD, Fernandez NF, Duan Q, Wang Z, et al.  
766 Enrichr: a comprehensive gene set enrichment analysis web server 2016 update.  
767 *Nucleic Acids Res* [Internet]. 2016 Jul 8 [cited 2021 May 28];44(W1):W90–7.

- 768 Available from: </pmc/articles/PMC4987924/>
- 769 19. Yue F, Cheng Y, Breschi A, Vierstra J, Wu W, Ryba T, et al. A comparative  
770 encyclopedia of DNA elements in the mouse genome. *Nature*. 2014 Nov  
771 20;515(7527):355–64.
- 772 20. Quinlan AR, Hall IM. BEDTools: a flexible suite of utilities for comparing genomic  
773 features. *Bioinformatics* [Internet]. 2010 Mar 15 [cited 2018 Nov 29];26(6):841–2.  
774 Available from: [https://academic.oup.com/bioinformatics/article-](https://academic.oup.com/bioinformatics/article-lookup/doi/10.1093/bioinformatics/btq033)  
775 [lookup/doi/10.1093/bioinformatics/btq033](https://academic.oup.com/bioinformatics/article-lookup/doi/10.1093/bioinformatics/btq033)
- 776 21. Kent WJ, Sugnet CW, Furey TS, Roskin KM, Pringle TH, Zahler AM, et al. The  
777 human genome browser at UCSC. *Genome Res*. 2002;12(6):996–1006.
- 778 22. Heinz S, Benner C, Spann N, Bertolino E, Lin YC, Laslo P, et al. Simple  
779 combinations of lineage-determining transcription factors prime cis-regulatory  
780 elements required for macrophage and B cell identities. *Mol Cell*. 2010;38(4):576–  
781 89.
- 782 23. Mathelier A, Fornes O, Arenillas DJ, Chen CY, Denay G, Lee J, et al. JASPAR  
783 2016: A major expansion and update of the open-access database of transcription  
784 factor binding profiles. *Nucleic Acids Res*. 2016;44(D1):D110–5.
- 785 24. McLeay RC, Bailey TL. Motif Enrichment Analysis: A unified framework and an  
786 evaluation on ChIP data. *BMC Bioinformatics*. 2010;
- 787 25. Bailey TL, Boden M, Buske FA, Frith M, Grant CE, Clementi L, et al. MEME Suite:  
788 Tools for motif discovery and searching. *Nucleic Acids Res*. 2009;
- 789 26. Tan G, Lenhard B. TFBSTools: an R/bioconductor package for transcription factor  
790 binding site analysis. *Bioinformatics* [Internet]. 2016 May 15 [cited 2018 Nov  
791 29];32(10):1555–6. Available from:  
792 <http://www.ncbi.nlm.nih.gov/pubmed/26794315>
- 793 27. Chorley BN, Campbell MR, Wang X, Karaca M, Sambandan D, Bangura F, et al.  
794 Identification of novel NRF2-regulated genes by ChiP-Seq: Influence on retinoid X  
795 receptor alpha. *Nucleic Acids Res*. 2012;
- 796 28. Oki S, Ohta T, Shioi G, Hatanaka H, Ogasawara O, Okuda Y, et al. ChIP-Atlas: a  
797 data-mining suite powered by full integration of public ChIP-seq data. *EMBO*  
798 *Rep*. 2018;
- 799 29. Karolchik D, Barber GP, Casper J, Clawson H, Cline MS, Diekhans M, et al. The  
800 UCSC genome browser database: 2014 update. *Nucleic Acids Res*.  
801 2013;42(D1):D764--D770.
- 802 30. Banerjee A, Nasir JA, Budyłowski P, Yip L, Aftanas P, Christie N, et al. Isolation,  
803 Sequence, Infectivity, and Replication Kinetics of Severe Acute Respiratory  
804 Syndrome Coronavirus 2. *Emerg Infect Dis* [Internet]. 2020 Sep 1 [cited 2021 May  
805 28];26(9):2054–63. Available from: </pmc/articles/PMC7454076/>
- 806 31. Banerjee A, El-Sayes N, Budyłowski P, McArthur AG, Doxey AC, Mossman K.  
807 Experimental and natural evidence of SARS-CoV-2-infection-induced activation of  
808 type I interferon responses. 2021 [cited 2021 May 28]; Available from:  
809 <https://doi.org/10.1016/j.isci>.
- 810 32. Banerjee A, Zhang X, Yip A, Schulz KS, Irving AT, Bowdish D, et al. Positive  
811 Selection of a Serine Residue in Bat IRF3 Confers Enhanced Antiviral Protection.  
812 *iScience* [Internet]. 2020 Mar 27 [cited 2021 May 28];23(3). Available from:  
813 <https://pubmed.ncbi.nlm.nih.gov/32179480/>

- 814 33. Ran FA, Hsu PD, Wright J, Agarwala V, Scott DA, Zhang F. Genome engineering  
815 using the CRISPR-Cas9 system. *Nat Protoc*. 2013;8(11):2281.
- 816 34. Boardman KC, Aryal AM, Miller WM, Waters CM. Actin Re-Distribution in  
817 Response to Hydrogen Peroxide in Airway Epithelial Cells. *J Cell Physiol*  
818 [Internet]. 2004 Apr [cited 2021 May 28];199(1):57–66. Available from:  
819 <https://pubmed.ncbi.nlm.nih.gov/14978735/>
- 820 35. Ewald CY. Redox signaling of nadph oxidases regulates oxidative stress  
821 responses, immunity and aging [Internet]. Vol. 7, Antioxidants. MDPI AG; 2018  
822 [cited 2021 May 28]. Available from: [/pmc/articles/PMC6210377/](https://pubmed.ncbi.nlm.nih.gov/36210377/)
- 823 36. Williams SJ, Wreschner DH, Tran M, Eyre HJ, Sutherland GR, McGuckin MA.  
824 MUC13, a Novel Human Cell Surface Mucin Expressed by Epithelial and  
825 Hemopoietic Cells. *J Biol Chem* [Internet]. 2001 Jan 25 [cited 2021 May  
826 28];276(21):18327–36. Available from:  
827 <https://pubmed.ncbi.nlm.nih.gov/11278439/>
- 828 37. Truswell A, Hanson J. Medical research among the !Kung. In: Lee RB, DeVore I,  
829 editors. *Kalahari Hunter-Gatherers*. Cambridge, MA: Harvard University Press;  
830 1976. p. 166–94.
- 831 38. Zeng W, Miyazato A, Chen G, Kajigaya S, Young NS, Maciejewski JP. Interferon-  
832  $\gamma$ -induced gene expression in CD34 cells: Identification of pathologic cytokine-  
833 specific signature profiles. *Blood* [Internet]. 2006 Jan 1 [cited 2021 May  
834 11];107(1):167–75. Available from: [http://ashpublications.org/blood/article-  
835 pdf/107/1/167/1279421/zh800106000167.pdf](http://ashpublications.org/blood/article-pdf/107/1/167/1279421/zh800106000167.pdf)
- 836 39. Dediego ML, Nogales A, Martinez-Sobrido L, Topham DJ. Interferon-induced  
837 protein 44 interacts with cellular fk506-binding protein 5, negatively regulates host  
838 antiviral responses, and supports virus replication. *MBio* [Internet]. 2019 Jul 1  
839 [cited 2021 May 28];10(4). Available from:  
840 <https://pubmed.ncbi.nlm.nih.gov/31455651/>
- 841 40. Onabajo OO, Banday AR, Stanifer ML, Yan W, Obajemu A, Santer DM, et al.  
842 Interferons and viruses induce a novel truncated ACE2 isoform and not the full-  
843 length SARS-CoV-2 receptor. *Nat Genet* [Internet]. 2020 Dec 1 [cited 2021 May  
844 11];52(12):1283–93. Available from: [https://www-nature-com.ezp-  
845 prod1.hul.harvard.edu/articles/s41588-020-00731-9](https://www-nature-com.ezp-prod1.hul.harvard.edu/articles/s41588-020-00731-9)
- 846 41. Taniguchi T, Takaoka A. The interferon- $\alpha/\beta$  system in antiviral responses: A  
847 multimodal machinery of gene regulation by the IRF family of transcription factors.  
848 Vol. 14, *Current Opinion in Immunology*. Elsevier Ltd; 2002. p. 111–6.
- 849 42. Patanavanich R, Glantz SA. Smoking Is Associated With COVID-19 Progression:  
850 A Meta-analysis. *Nicotine Tob Res* [Internet]. 2020 Aug 24 [cited 2021 May  
851 2];22(9):1653–6. Available from:  
852 <https://academic.oup.com/ntr/article/22/9/1653/5835834>
- 853 43. Vardavas CI, Nikitara K. COVID-19 and smoking: A systematic review of the  
854 evidence [Internet]. Vol. 18, *Tobacco Induced Diseases*. International Society for  
855 the Prevention of Tobacco Induced Diseases; 2020 [cited 2021 May 2]. Available  
856 from: [/pmc/articles/PMC7083240/](https://pubmed.ncbi.nlm.nih.gov/36210377/)
- 857 44. Alqahtani JS, Oyelade T, Aldhahir AM, Alghamdi SM, Almehmadi M, Alqahtani  
858 AS, et al. Prevalence, Severity and Mortality associated with COPD and Smoking  
859 in patients with COVID-19: A Rapid Systematic Review and Meta-Analysis. *Bhatt*



- 860 GC, editor. PLoS One [Internet]. 2020 May 11 [cited 2021 May  
861 2];15(5):e0233147. Available from:  
862 <https://dx.plos.org/10.1371/journal.pone.0233147>
- 863 45. Lippi G, Henry BM. Active smoking is not associated with severity of coronavirus  
864 disease 2019 (COVID-19) [Internet]. Vol. 75, European Journal of Internal  
865 Medicine. Elsevier B.V.; 2020 [cited 2021 May 2]. p. 107–8. Available from:  
866 [www.elsevier.com/locate/ejim](http://www.elsevier.com/locate/ejim)
- 867 46. Cattaruzza MS, Zagà V, Gallus S, D'Argenio P, Gorini G. Tobacco smoking and  
868 COVID-19 pandemic: Old and new issues. A summary of the evidence from the  
869 scientific literature. Acta Biomed [Internet]. 2020 [cited 2021 May 2];91(2):106–12.  
870 Available from: [/pmc/articles/PMC7569632/](https://pubmed.ncbi.nlm.nih.gov/32569632/)
- 871 47. Zhao Q, Meng M, Kumar R, Wu Y, Huang J, Lian N, et al. The impact of COPD  
872 and smoking history on the severity of COVID-19: A systemic review and meta-  
873 analysis. J Med Virol [Internet]. 2020 Oct 17 [cited 2021 May 2];92(10):1915–21.  
874 Available from: <https://onlinelibrary.wiley.com/doi/10.1002/jmv.25889>
- 875 48. Brake SJ, Barnsley K, Lu W, McAlinden KD, Eapen MS, Sohal SS. Smoking  
876 Upregulates Angiotensin-Converting Enzyme-2 Receptor: A Potential Adhesion  
877 Site for Novel Coronavirus SARS-CoV-2 (Covid-19). J Clin Med [Internet]. 2020  
878 Mar 20 [cited 2021 May 25];9(3):841. Available from: [www.mdpi.com/journal/jcm](http://www.mdpi.com/journal/jcm)
- 879 49. Cai G, Bossé Y, Xiao F, Kheradmand F, Amos CI. Tobacco smoking increases  
880 the lung gene expression of ACE2, the Receptor of SARS-CoV-2 [Internet]. Vol.  
881 201, American Journal of Respiratory and Critical Care Medicine. American  
882 Thoracic Society; 2020 [cited 2021 May 25]. p. 1557–9. Available from:  
883 <https://www.medrxiv.org/content/>
- 884 50. Leung JM, Yang CX, Tam A, Shaipanich T, Hackett TL, Singhera GK, et al. ACE-  
885 2 expression in the small airway epithelia of smokers and COPD patients:  
886 Implications for COVID-19 [Internet]. Vol. 55, European Respiratory Journal.  
887 European Respiratory Society; 2020 [cited 2021 May 29]. Available from:  
888 <https://doi.org/10.1183/13993003.02108-2020>.
- 889 51. Gebe S, Dieh S, Pype J, Friedrichs B, Weiler H, Schüller J, et al. The  
890 transcriptome of Nrf2<sup>-/-</sup> mice provides evidence for impaired cell cycle  
891 progression in the development of cigarette smoke-induced emphysematous  
892 changes. Toxicol Sci [Internet]. 2010 May [cited 2021 May 29];115(1):238–52.  
893 Available from: <https://pubmed.ncbi.nlm.nih.gov/20133372/>
- 894 52. Rangasamy T, Cho CY, Thimmulappa RK, Zhen L, Srisuma SS, Kensler TW, et  
895 al. Genetic ablation of Nrf2 enhances susceptibility to cigarette smoke-induced  
896 emphysema in mice. J Clin Invest [Internet]. 2004 Nov 1 [cited 2021 May  
897 29];114(9):1248–59. Available from: <https://pubmed.ncbi.nlm.nih.gov/15520857/>
- 898 53. Verschoor ML, Wilson LA, Verschoor CP, Singh G. Ets-1 regulates energy  
899 metabolism in cancer cells. PLoS One [Internet]. 2010 [cited 2021 May 29];5(10).  
900 Available from: <https://pubmed.ncbi.nlm.nih.gov/21042593/>
- 901 54. Ni W, Zhan Y, He H, Maynard E, Balschi JA, Oettgen P. Ets-1 is a critical  
902 transcriptional regulator of reactive oxygen species and p47phox gene expression  
903 in response to angiotensin II. Circ Res [Internet]. 2007 Nov 9 [cited 2021 May  
904 25];101(10):985–94. Available from: <http://circres.ahajournals.org>
- 905 55. Wilson LA, Gemin A, Espiritu R, Singh G. Ets-1 is transcriptionally up-regulated



- 906 by H<sub>2</sub>O<sub>2</sub> via an antioxidant response element. *FASEB J* [Internet]. 2005 Dec 1  
907 [cited 2021 May 29];19(14):2085–7. Available from: [https://faseb-onlinelibrary-](https://faseb-onlinelibrary-wiley-com.ezp-prod1.hul.harvard.edu/doi/full/10.1096/fj.05-4401fje)  
908 [wiley-com.ezp-prod1.hul.harvard.edu/doi/full/10.1096/fj.05-4401fje](https://faseb-onlinelibrary-wiley-com.ezp-prod1.hul.harvard.edu/doi/full/10.1096/fj.05-4401fje)  
909 56. Klatt P, Molina EP, Lacoba MG, Padilla CA, Martínez-Galisteo E, Barcena J, et al.  
910 Redox regulation of c-Jun DNA binding by reversible S-glutathiolation. *FASEB J*  
911 [Internet]. 1999 Sep 1 [cited 2021 May 25];13(12):1481–90. Available from:  
912 <https://faseb.onlinelibrary.wiley.com/doi/full/10.1096/fasebj.13.12.1481>  
913 57. Rauscher FJ, Voulalas PJ, Franza BR, Curran T. Fos and Jun bind cooperatively  
914 to the AP-1 site: reconstitution in vitro. *Genes Dev* [Internet]. 1988 [cited 2021  
915 May 29];2(12 B):1687–99. Available from:  
916 <https://pubmed.ncbi.nlm.nih.gov/2467839/>  
917 58. Jeyapaul J, Jaiswal AK. Nrf2 and c-Jun regulation of antioxidant response  
918 element (ARE)-mediated expression and induction of  $\gamma$ -glutamylcysteine  
919 synthetase heavy subunit gene. *Biochem Pharmacol* [Internet]. 2000 Jun 1 [cited  
920 2021 May 29];59(11):1433–9. Available from:  
921 <https://pubmed.ncbi.nlm.nih.gov/10751553/>  
922 59. Fang Y, Gao F, Liu Z. Angiotensin-converting enzyme 2 attenuates inflammatory  
923 response and oxidative stress in hyperoxic lung injury by regulating NF- $\kappa$ B and  
924 Nrf2 pathways. *QJM* [Internet]. 2019 Dec 1 [cited 2021 May 11];112(12):914–24.  
925 Available from: <https://academic.oup.com/qjmed/article/112/12/914/5545082>  
926 60. Smith JC, Sausville EL, Girish V, Yuan M Lou, Vasudevan A, John KM, et al.  
927 Cigarette Smoke Exposure and Inflammatory Signaling Increase the Expression  
928 of the SARS-CoV-2 Receptor ACE2 in the Respiratory Tract. *Dev Cell*. 2020 Jun  
929 8;53(5):514-529.e3.  
930 61. Mahmudpour M, Roozbeh J, Keshavarz M, Farrokhi S, Nabipour I. COVID-19  
931 cytokine storm: The anger of inflammation [Internet]. Vol. 133, *Cytokine*.  
932 Academic Press; 2020 [cited 2021 May 29]. Available from:  
933 <https://pubmed.ncbi.nlm.nih.gov/32544563/>  
934 62. Ni W, Yang X, Yang D, Bao J, Li R, Xiao Y, et al. Role of angiotensin-converting  
935 enzyme 2 (ACE2) in COVID-19 [Internet]. Vol. 24, *Critical Care*. BioMed Central;  
936 2020 [cited 2021 May 3]. p. 422. Available from:  
937 <https://ccforum.biomedcentral.com/articles/10.1186/s13054-020-03120-0>  
938 63. Qiao Y, Wang XM, Mannan R, Pitchiaya S, Zhang Y, Wotring JW, et al. Targeting  
939 transcriptional regulation of SARS-CoV-2 entry factors ACE2 and TMPRSS2.  
940 *Proc Natl Acad Sci U S A* [Internet]. 2020 [cited 2021 May 3];118(1). Available  
941 from: <https://doi.org/10.1073/pnas.2021450118>  
942 64. Park JE, Jung S, Kim A. MERS transmission and risk factors: A systematic  
943 review. *BMC Public Health* [Internet]. 2018 May 2 [cited 2021 May 2];18(1).  
944 Available from: [/pmc/articles/PMC5930778/](https://pubmed.ncbi.nlm.nih.gov/305930778/)  
945 65. Arcavi L, Benowitz NL. Cigarette smoking and infection [Internet]. Vol. 164,  
946 *Archives of Internal Medicine*. Arch Intern Med; 2004 [cited 2021 May 2]. p. 2206–  
947 16. Available from: <https://pubmed.ncbi.nlm.nih.gov/15534156/>  
948 66. Pierrou S, Broberg P, O'Donnell RA, Pawłowski K, Virtala R, Lindqvist E, et al.  
949 Expression of genes involved in oxidative stress responses in airway epithelial  
950 cells of smokers with chronic obstructive pulmonary disease. *Am J Respir Crit*  
951 *Care Med* [Internet]. 2007 Mar 15 [cited 2021 May 3];175(6):577–86. Available

- 952 from: <http://www.atsjournals.org/doi/abs/10.1164/rccm.200607-931OC>
- 953 67. Xia H, Suda S, Bindom S, Feng Y, Gurley SB, Seth D, et al. ACE2-Mediated  
954 reduction of oxidative stress in the central nervous system is associated with  
955 improvement of autonomic function. *PLoS One* [Internet]. 2011 [cited 2021 May  
956 3];6(7). Available from: <https://pubmed.ncbi.nlm.nih.gov/21818366/>
- 957 68. Zheng J, Li G, Chen S, Bihl J, Buck J, Zhu Y, et al. Activation of the ACE2/Ang-(1-  
958 7)/Mas pathway reduces oxygen-glucose deprivation-induced tissue swelling,  
959 ROS production, and cell death in mouse brain with angiotensin II overproduction.  
960 *Neuroscience*. 2014 Jul 25;273:39–51.
- 961 69. Rabelo LA, Alenina N, Bader M. ACE2-angiotensin-(1-7)-Mas axis and oxidative  
962 stress in cardiovascular disease [Internet]. Vol. 34, *Hypertension Research*.  
963 Nature Publishing Group; 2011 [cited 2021 May 3]. p. 154–60. Available from:  
964 [www.nature.com/hr](http://www.nature.com/hr)
- 965 70. Shenoy V, Qi Y, Katovich MJ, Raizada MK. ACE2, a promising therapeutic target  
966 for pulmonary hypertension [Internet]. Vol. 11, *Current Opinion in Pharmacology*.  
967 Elsevier Ltd; 2011 [cited 2021 May 29]. p. 150–5. Available from:  
968 <https://pubmed.ncbi.nlm.nih.gov/21215698/>
- 969 71. Ma Q. Role of Nrf2 in oxidative stress and toxicity [Internet]. Vol. 53, *Annual*  
970 *Review of Pharmacology and Toxicology*. NIH Public Access; 2013 [cited 2021  
971 May 25]. p. 401–26. Available from: [/pmc/articles/PMC4680839/](https://pubmed.ncbi.nlm.nih.gov/24680839/)
- 972 72. Hung YH, Hsieh WY, Hsieh JS, Liu FC, Tsai CH, Lu LC, et al. Alternative roles of  
973 STAT3 and MAPK signaling pathways in the MMPs activation and progression of  
974 lung injury induced by cigarette smoke exposure in ACE2 knockout mice. *Int J*  
975 *Biol Sci* [Internet]. 2016 Feb 12 [cited 2021 May 29];12(4):454–65. Available from:  
976 <https://pubmed.ncbi.nlm.nih.gov/27019629/>
- 977 73. Liu A, Zhang X, Li R, Zheng M, Yang S, Dai L, et al. Overexpression of the SARS-  
978 CoV-2 receptor ACE2 is induced by cigarette smoke in bronchial and alveolar  
979 epithelia. *J Pathol* [Internet]. 2021 Jan 1 [cited 2021 May 29];253(1):17–30.  
980 Available from: [www.thejournalofpathology.com](http://www.thejournalofpathology.com)
- 981 74. Olloquequi J. COVID-19 Susceptibility in chronic obstructive pulmonary disease  
982 [Internet]. Vol. 50, *European Journal of Clinical Investigation*. Blackwell Publishing  
983 Ltd; 2020 [cited 2021 May 2]. Available from:  
984 <https://pubmed.ncbi.nlm.nih.gov/32780415/>
- 985 75. Leung JM, Niikura M, Yang CWT, Sin DD. COVID-19 and COPD [Internet]. Vol.  
986 56, *European Respiratory Journal*. 2020 [cited 2021 May 29]. Available from:  
987 <https://doi.org/10.1183/13993003.02108-2020>.
- 988 76. Sopori M. Effects of cigarette smoke on the immune system [Internet]. Vol. 2,  
989 *Nature Reviews Immunology*. European Association for Cardio-Thoracic Surgery;  
990 2002 [cited 2021 May 2]. p. 372–7. Available from:  
991 <https://pubmed.ncbi.nlm.nih.gov/12033743/>
- 992 77. Rahman I, Morrison D, Donaldson K, Macnee W. Systemic oxidative stress in  
993 asthma, COPD, and smokers. *Am J Respir Crit Care Med* [Internet]. 1996 [cited  
994 2021 May 29];154(4 Pt 1):1055–60. Available from:  
995 <https://pubmed.ncbi.nlm.nih.gov/8887607/>

996  
997 **Supplementary Tables**

998  
999  
1000  
1001  
1002  
1003  
1004  
1005  
1006  
1007  
1008  
1009  
1010  
1011  
1012  
1013  
1014  
1015  
1016  
1017  
1018  
1019  
1020  
1021  
1022  
1023  
1024  
1025  
1026  
1027  
1028  
1029  
1030  
1031  
1032  
1033  
1034  
1035  
1036  
1037  
1038  
1039  
1040  
1041  
1042  
1043

**Table S1: Microarray expression analyses.** Sheet 1: Metadata for microarray expression datasets downloaded and processed for this study. Sheet 2: The top 200 genes co-expressed with *ACE2* expression (by Pearson correlation) across the indicated expression analysis (relevant main/supplemental figure also indicated). Sheet 3: enrichR gene-set enrichment results for gene sets shown in Sheet 2 – statistical results correspond with enrichments visualized in indicated main/supplemental figures.

**Table S2: *ACE2* regulation and experimental data.** Sheet 1: CRISPR Guide and PCR primer information. Sheet 2: Gene expression data for genes nearby *ACE2* following deletion of the indicated regulatory region. ‘VC’ – comparisons of deletion to vector-control samples (see Methods). Sheet 2: Expression of full-length *ACE2*, and the d*ACE2* isoform, following either IFN treatment of H<sub>2</sub>O<sub>2</sub> treatment – results correspond to Figures S2 and S4, respectively. Sheet 3: Expression of full-length *ACE2*, and the d*ACE2* isoform, following deletion of the indicated region, either in the presence or absence of IFN treatment. Sheet 4: Expression of full-length *ACE2*, and the d*ACE2* isoform, following deletion of the indicated region, either in the presence or absence of H<sub>2</sub>O<sub>2</sub> treatment.

1044 **Supplementary Figures**  
1045

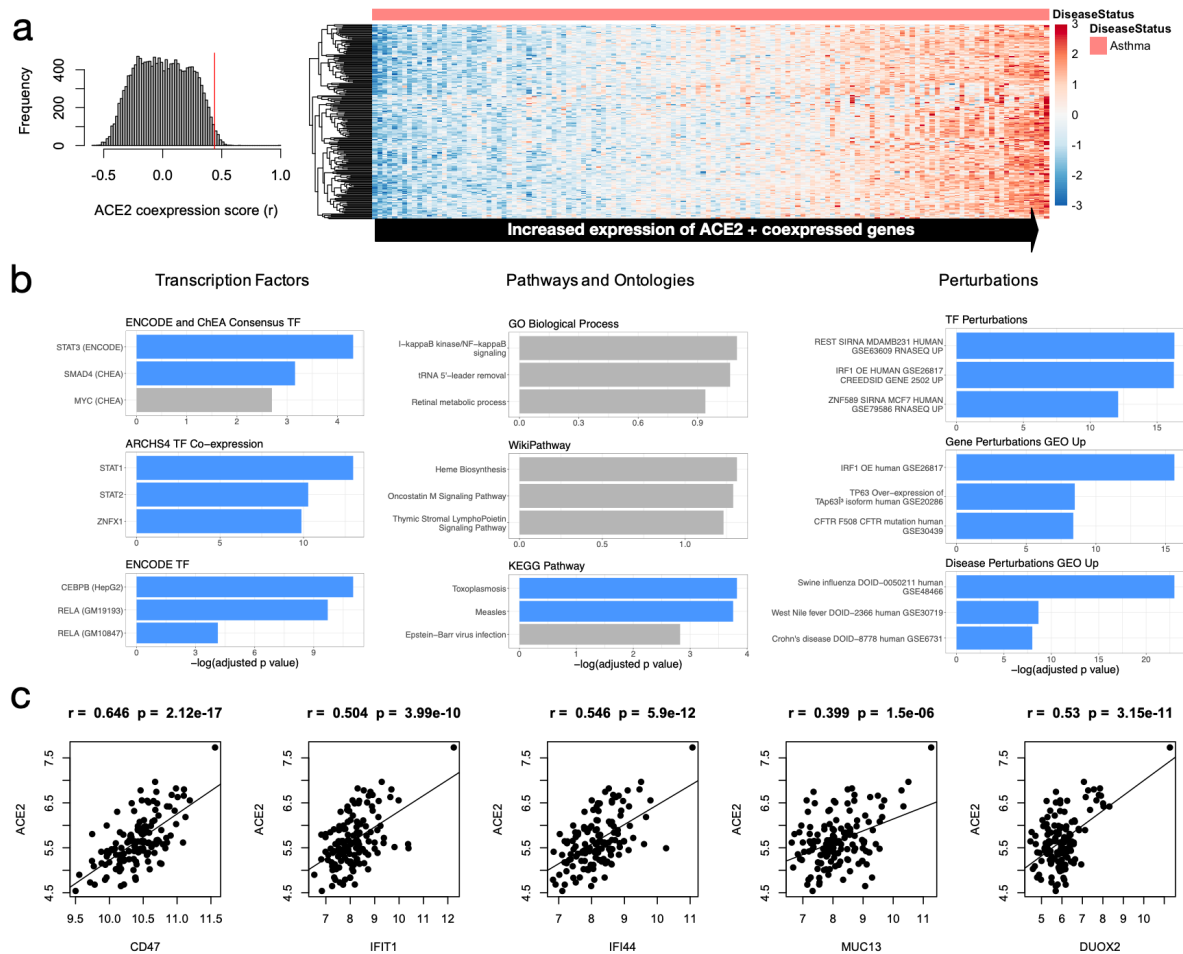

**Figure S1. ACE2 co-expressed genes and functional associations in asthmatics.**  
**a)** Expression of top 200 ACE2-correlated genes (including ACE2) in asthmatics (N=136). **b)** Functional enrichment analysis of top 200 ACE2-correlated genes (including ACE2). Terms are ranked by  $-\log_2(\text{FDR-adjusted } p \text{ value})$  for nine ontologies/groups of interest. **c)** Pearson correlation of ACE2 with important interferon-related candidate genes found to be co-expressed with ACE2.

1046  
1047  
1048  
1049  
1050  
1051  
1052  
1053  
1054  
1055  
1056  
1057

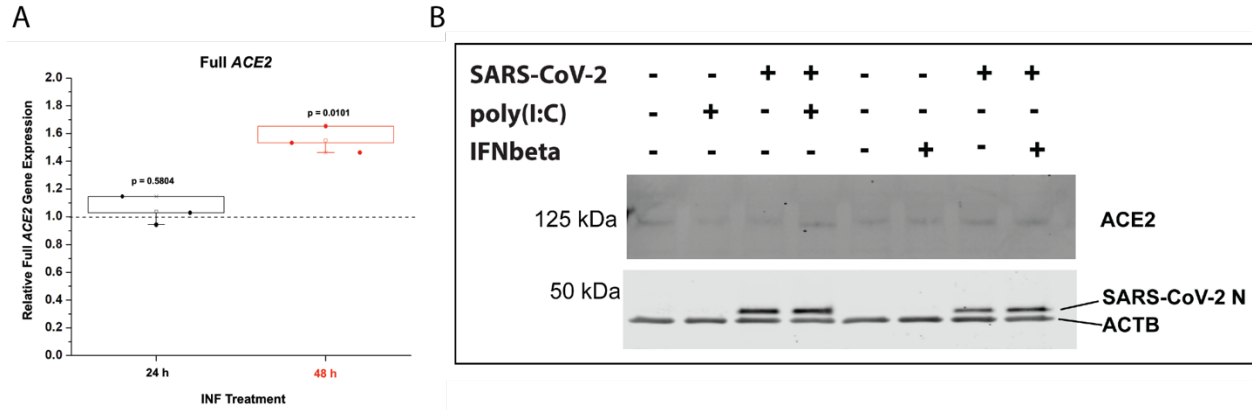

1058  
1059  
1060  
1061  
1062  
1063  
1064  
1065  
1066  
1067  
1068  
1069  
1070  
1071  
1072  
1073  
1074  
1075  
1076  
1077

**Figure S2. ACE2 expression in response to immune signalling.** (A) Expression of full-length ACE2 following 24 or 48h of IFN- $\alpha$  treatment – p-values of expression change relative to untreated controls. (B) Immunoblots for ACE2 protein in Calu3 cell lysate in the context of SARS-CoV-2 infection, poly(I:C) treatment, and/or IFN $\beta$ 1 treatment. See Methods.



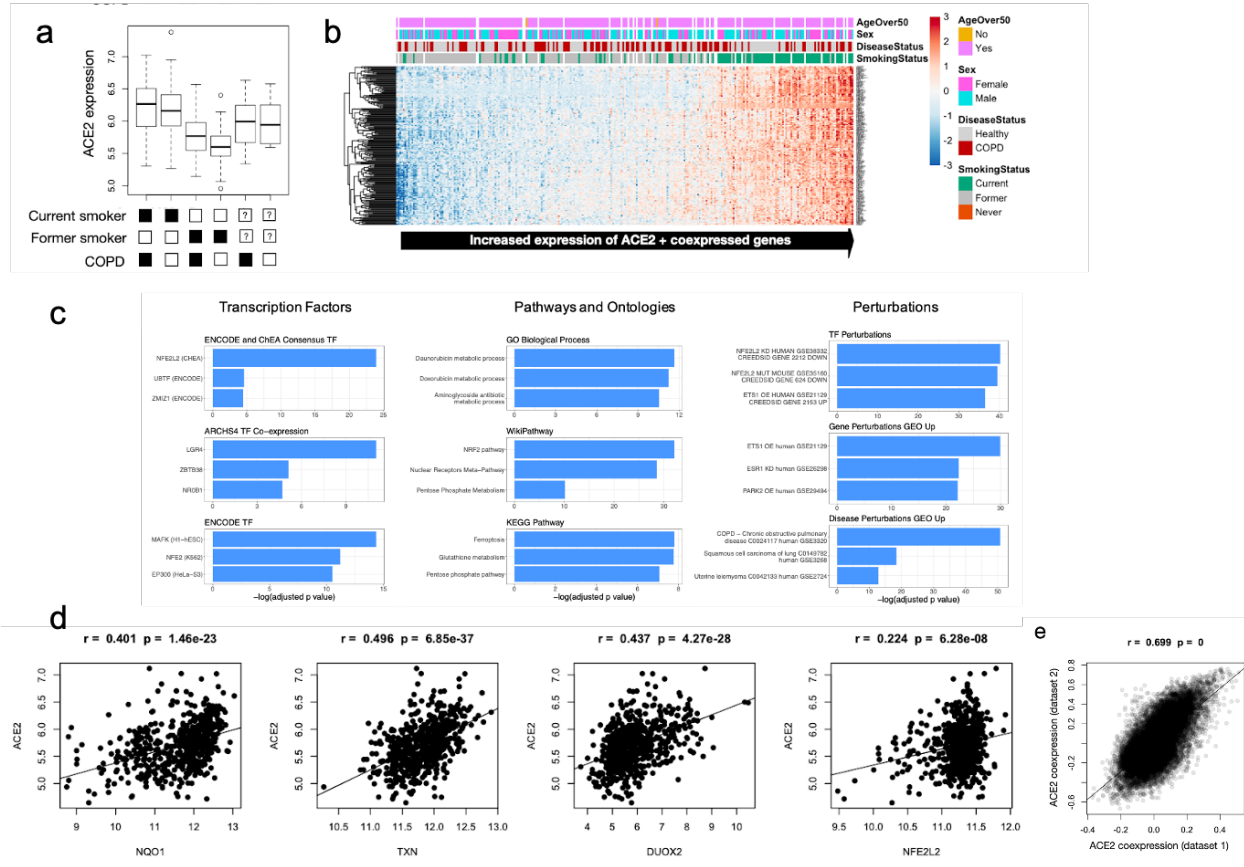

1078  
1079  
1080  
1081  
1082  
1083  
1084  
1085  
1086  
1087  
1088  
1089  
1090  
1091

**Figure S3. Expression and functional enrichment analysis of ACE2 and co-expressed genes in smokers and individuals with COPD.** a) Analysis of relative ACE2 expression with respect to smoking status and COPD diagnosis. b) Expression of top 200 ACE2-correlated genes (including ACE2) individuals with various smoking status and COPD diagnosis (N=345). c) Functional enrichment analysis of top 200 ACE2-correlated genes (including ACE2). Terms are ranked by  $-\log_2(\text{FDR-adjusted } p \text{ value})$  for nine ontologies/groups of interest. d) Pearson correlation of ACE2 with important interferon-related candidate genes found to be co-expressed with ACE2. e) Correlation between dataset 1 (N=159, Figure 3) and dataset 2 (N=345, Figure S3).

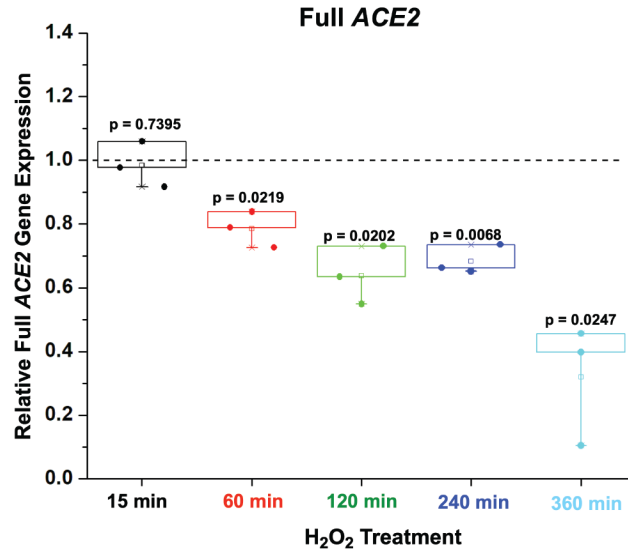

1092  
1093  
1094  
1095  
1096  
1097  
1098

**Figure S4. ACE2 expression in response to oxidative stress.** Expression of ACE2 in Calu-3 cells (relative to untreated controls) following H<sub>2</sub>O<sub>2</sub> treatment for the indicated length of time (see Methods, Table S2).
